# Supplementary material for: Cancer Drug Response Profile scan (CDRscan): A Deep Learning Model That Predicts Drug Effectiveness from Cancer Genomic Signature
Source: Springer Nature journal article supplement (doi:10.1038/s41598-018-27214-6), 2018-06-05
Supplement: MOESM1 [file 41598_2018_27214_MOESM1_ESM.pdf]

# Cancer Drug Response Profile scan (CDRscan): A Deep Learning Model That Predicts Drug Effectiveness from Cancer Genomic Signature

Yoosup Chang<sup>1</sup>, Hyejin Park<sup>1</sup>, Seungju Lee<sup>1</sup>, Hyun-Jin Yang<sup>2</sup>, Kwee-Yum Lee<sup>2,3</sup>, Tae Soon Kim<sup>2,4</sup>, Jongsun Jung<sup>5\*</sup>, and Jae-Min Shin<sup>1\*</sup>

<sup>1</sup>Yongin *in silico* Medical Research Center, Syntekabio Inc., 283 Dongbaekjungang-ro, C508, Giheung-gu, Yongin, Gyeonggi-do, 17006, South Korea, <sup>2</sup>Gwanghwamun Medical Study Center, Syntekabio Inc., 92 Saemunan-ro, #1708, Jongno-gu, Seoul, 03186, South Korea, <sup>3</sup>Faculty of Medicine, University of Queensland, Brisbane, QLD, 4072, Australia, <sup>4</sup>Department of Clinical Medical Sciences, Seoul National University College of Medicine, 71 Ihwajang-gil, Jongno-gu, 03087, Seoul, South Korea, <sup>5</sup>Genome Data Integration Center, Syntekabio Inc., 187 Techno 2-ro, B512, Yuseong-gu, Daejeon, 34025, South Korea

\*Corresponding authors

Supplementary Figure S1. Architectures of individual models of CDRscan.

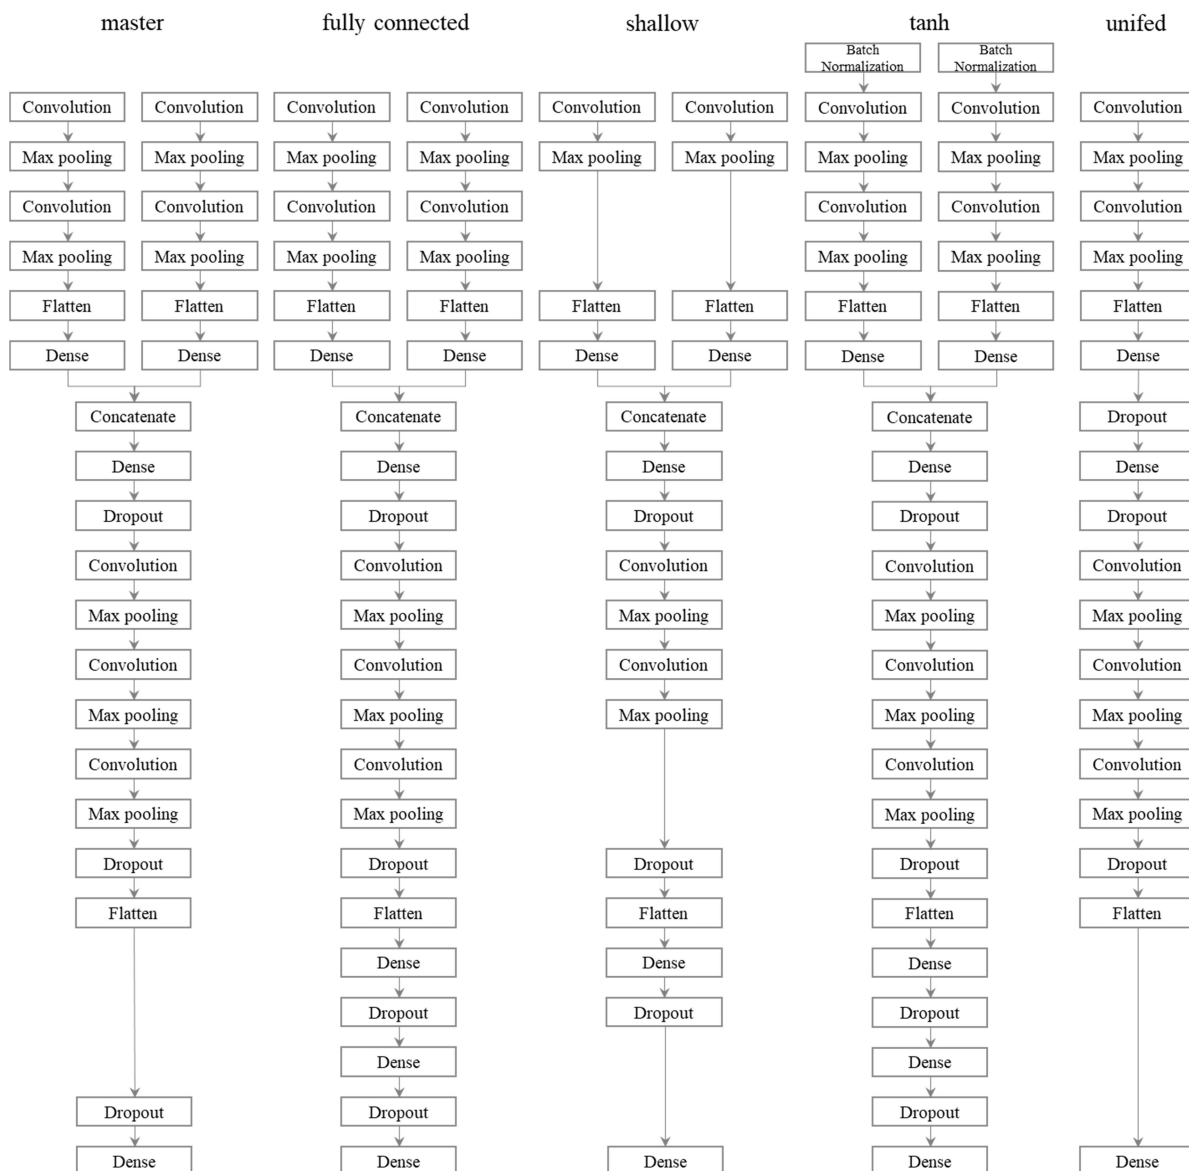

Architectures of individual models of CDRscan. To achieve generalizability of the prediction model and to avoid having model-specific artifact, we designed an ensemble model that is composed of five independent models. The major differences introduced to individual models include the number of the convolution layers, presence of absence of fully connected layer, normalisation, and inclusion of the novel dual convergence architecture.

Supplementary Figure S2. Assessment of prediction accuracy of individual CDRscan models.

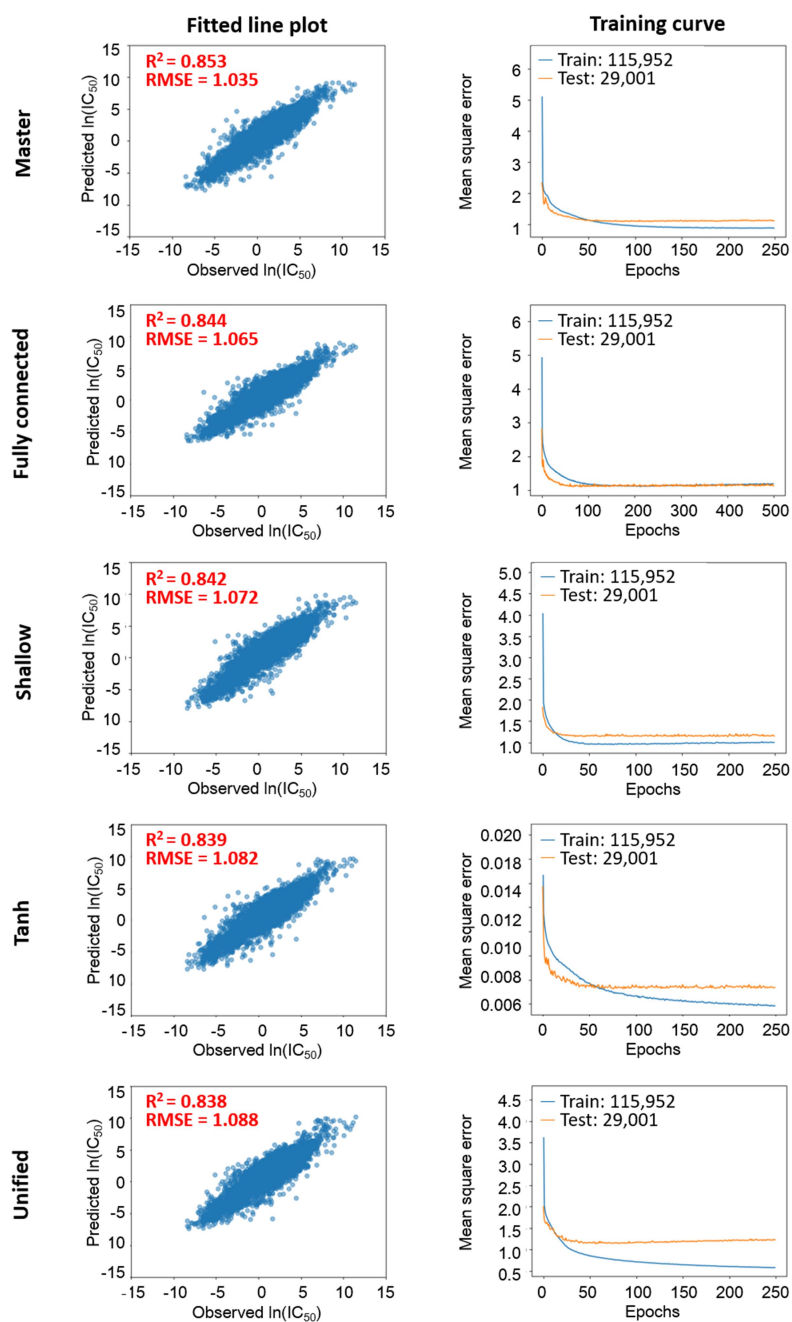

Performance of individual models of CDRscan was evaluated with 5% held out test set. Scatter plots show for the individual models the correlation between the observed and the predicted  $IC_{50}$  values (in a natural log scale). The  $R^2$  values and root mean squared errors for each model were indicated. Training curves show mean squared errors of train (blue) or test (orange) set at each epoch. The number of data points used in the train and the test set was indicated.

Supplementary Figure S3. Assessment of prediction accuracy of CDRscan using AUROC.

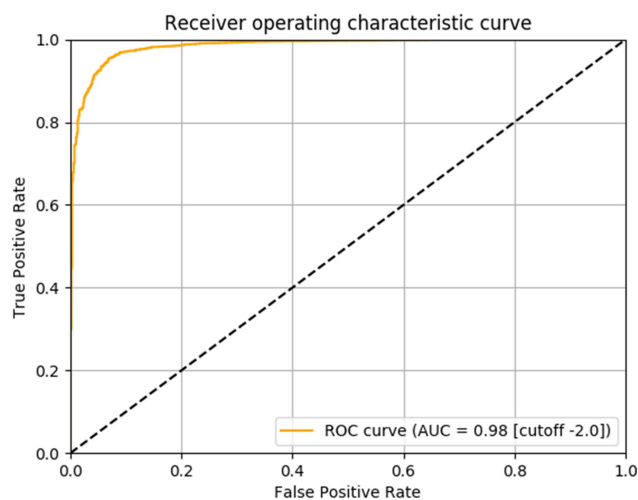

The area under the receiver operating characteristic curve (AUROC) was computed with a validation set (5% of all instances, which were not used for training,  $n = 7,641$ ) using  $\ln IC_{50}$  of -2 as a cutoff. A drug was considered active for a given cell line when  $\ln IC_{50}$  was lower than -2 and considered inactive otherwise.

Supplementary Figure S4. Mutational status across all cell lines over 25 cancer types.

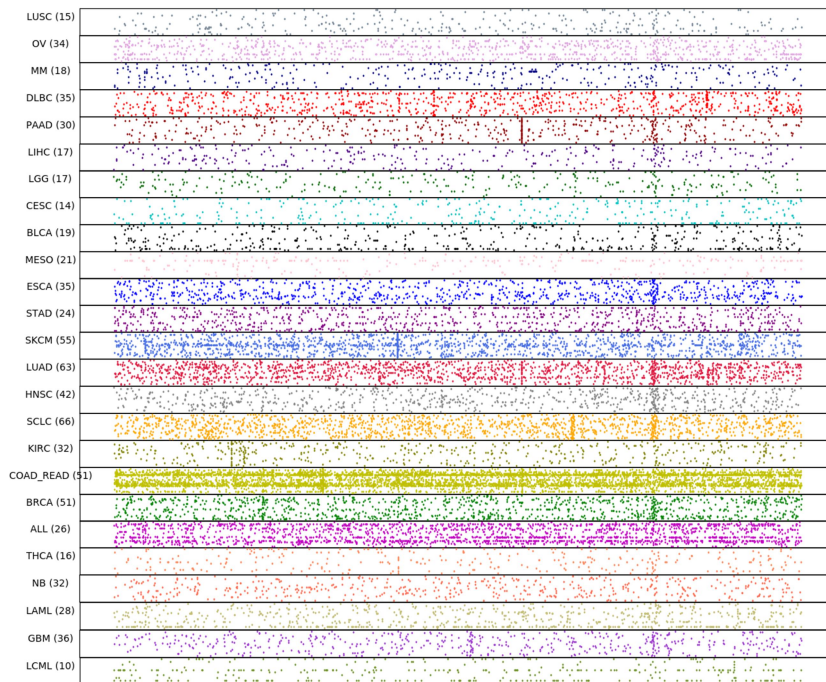

|                | NC    | NG    | NM    | R <sup>2</sup> |
|----------------|-------|-------|-------|----------------|
| NC             | 1.00  | 0.77  | 0.56  | -0.09          |
| NG             | 0.77  | 1.00  | 0.79  | -0.18          |
| NM             | 0.56  | 0.79  | 1.00  | -0.13          |
| R <sup>2</sup> | -0.09 | -0.18 | -0.13 | 1.00           |

NC: Number of cell lines per cancer type  
 NG: Total number of mutated genes per cancer type  
 NM: Total number of mutations per cancer type

A plot represents the mutational status across 28,328 positions for all cell lines over 25 cancer types. Cancer types and the number of relevant cell lines are indicated on the left of each row. The list of the cancer types are sorted by R<sup>2</sup> values, with the highest R<sup>2</sup> value on the top. The R<sup>2</sup> values of individual cancer types are listed in the Supplementary Fig. S5. Each row represents a cell line, and individual dots indicate mutated base positions.

Supplementary Figure S5. Assessment of prediction accuracy of CDRscan™ for individual cancer types.

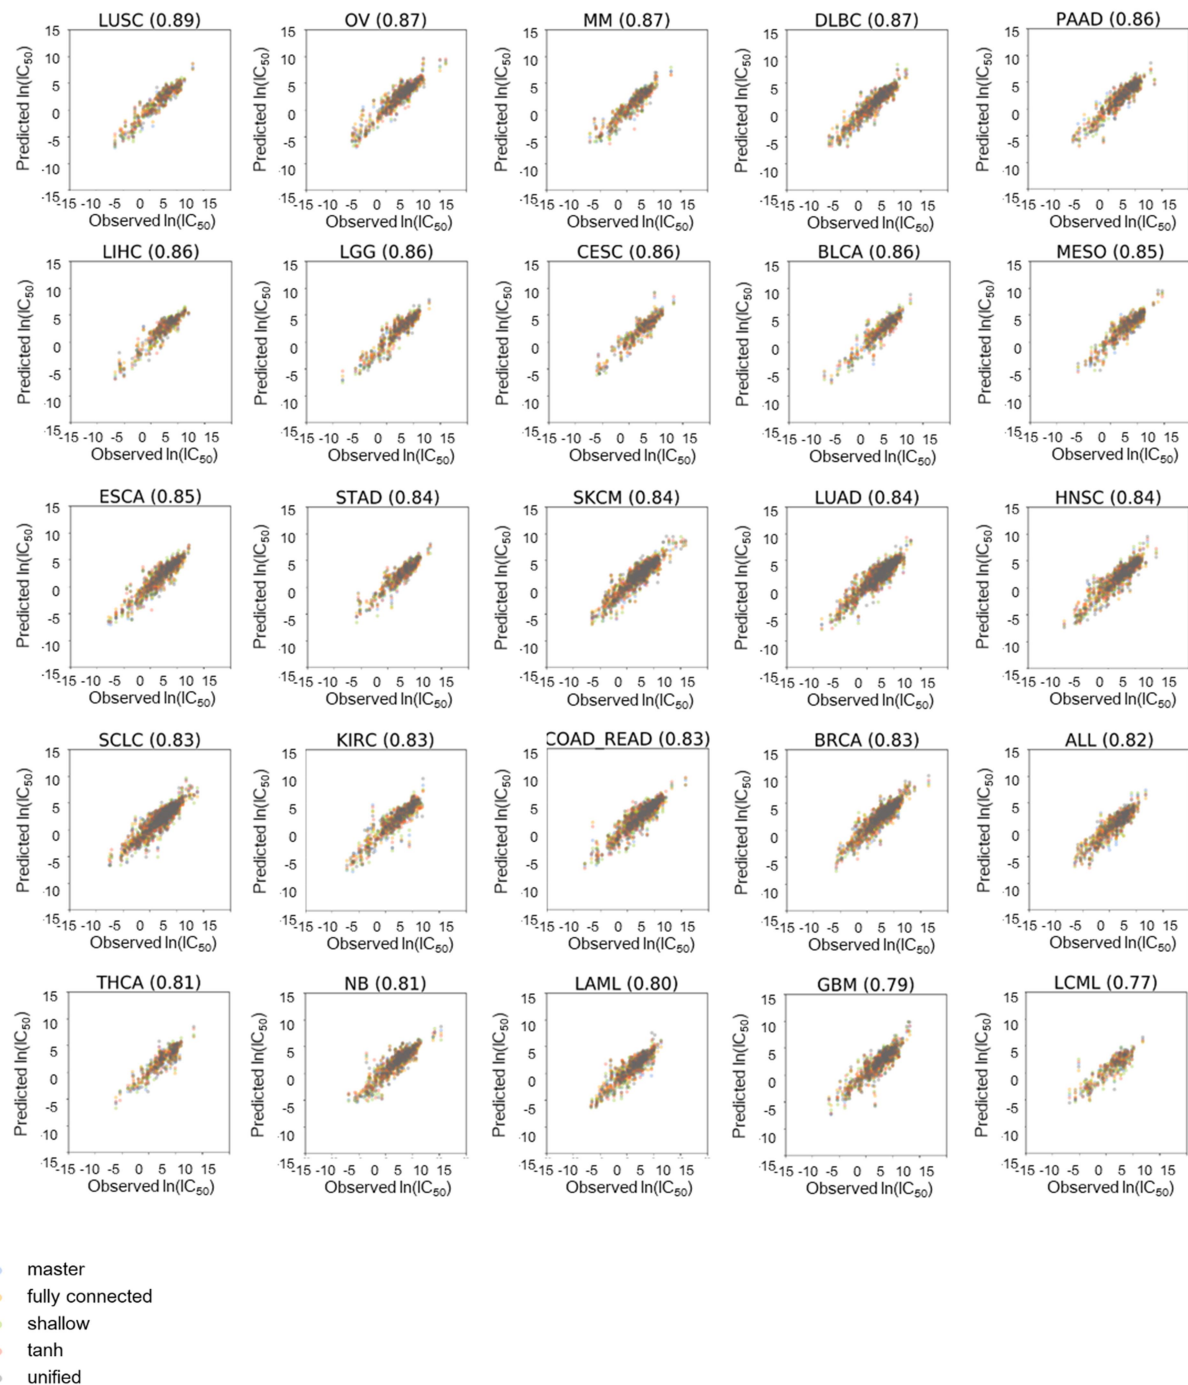

Each scatter plot shows a correlation between the observed and the CDRscan-predicted IC<sub>50</sub> values in a natural log scale (in x- and y-axis, respectively) for individual cancer types. For each cancer type, 5% of the instances that were not used for model training were used to validate five models of CDRscan. Scatter plots of the five models are superimposed on top of one another, generating one plot per cancer type. The cancer type and the mean R<sup>2</sup> values of the five models are indicated on the top of each plot, and the color keys are shown on the bottom of the figure.

Supplementary Figure S6. Cell line-centric correlation analysis.

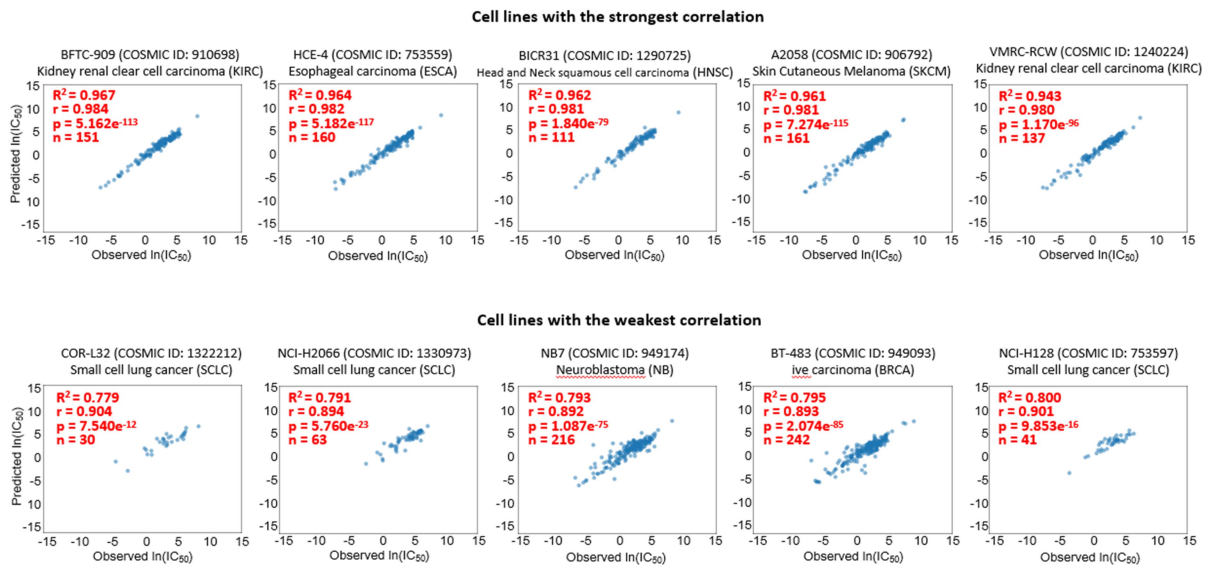

Scatter plots showing the degrees of correlation between the observed and the CDRscan-predicted  $\ln(\text{IC}_{50})$  values for 10 cell lines, showing 5 top cell lines with the strongest (top) and 5 bottom ones with the lowest  $R^2$  values (bottom). Each plot is labeled with the name of the cell line, the COSMIC ID, and corresponding cancer type. The  $R^2$ , Pearson correlation coefficient ( $r$ ),  $p$  values, and instance counts are indicated at the upper left corner of each plot.

Supplementary Figure S7. Drug-centric correlation analysis.

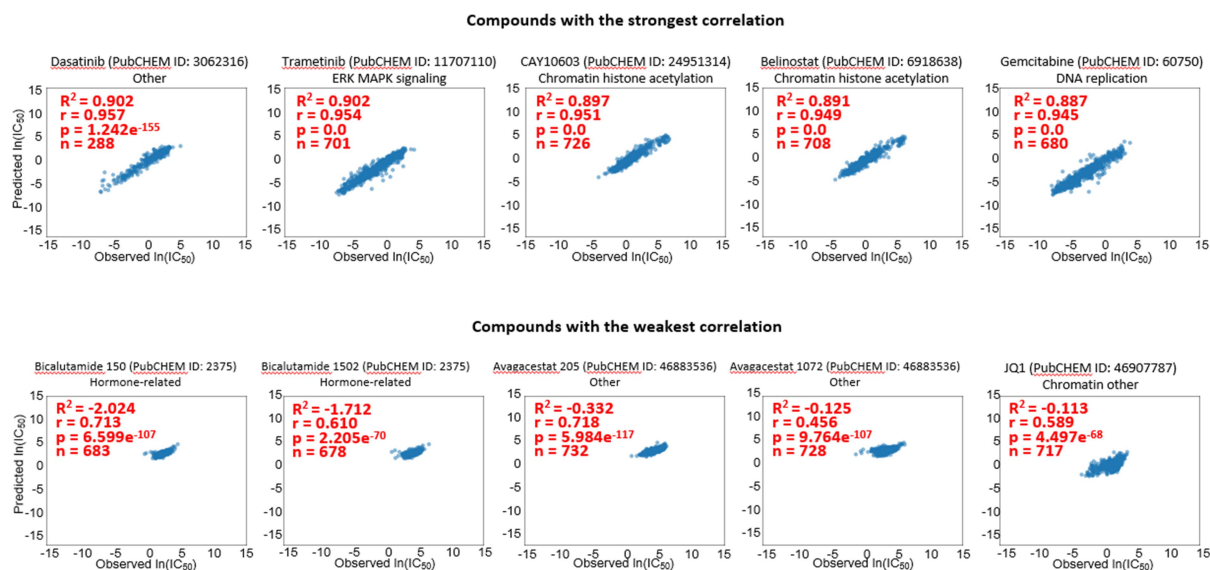

Scatter plots showing the degrees of correlation between the observed and the CDRscan-predicted  $\ln(\text{IC}_{50})$  values for 10 drugs, showing the 5 top drugs with strongest (top) and 5 bottom drugs with the lowest  $R^2$  (bottom). Each drug is labeled with its name, PubChem ID, and its target pathway. The  $R^2$ , Pearson correlation coefficient ( $r$ ),  $p$  values, and instance counts are indicated at the upper left corner of each plot.



Supplementary Figure S8. Five-fold cross validation of CDRscan.

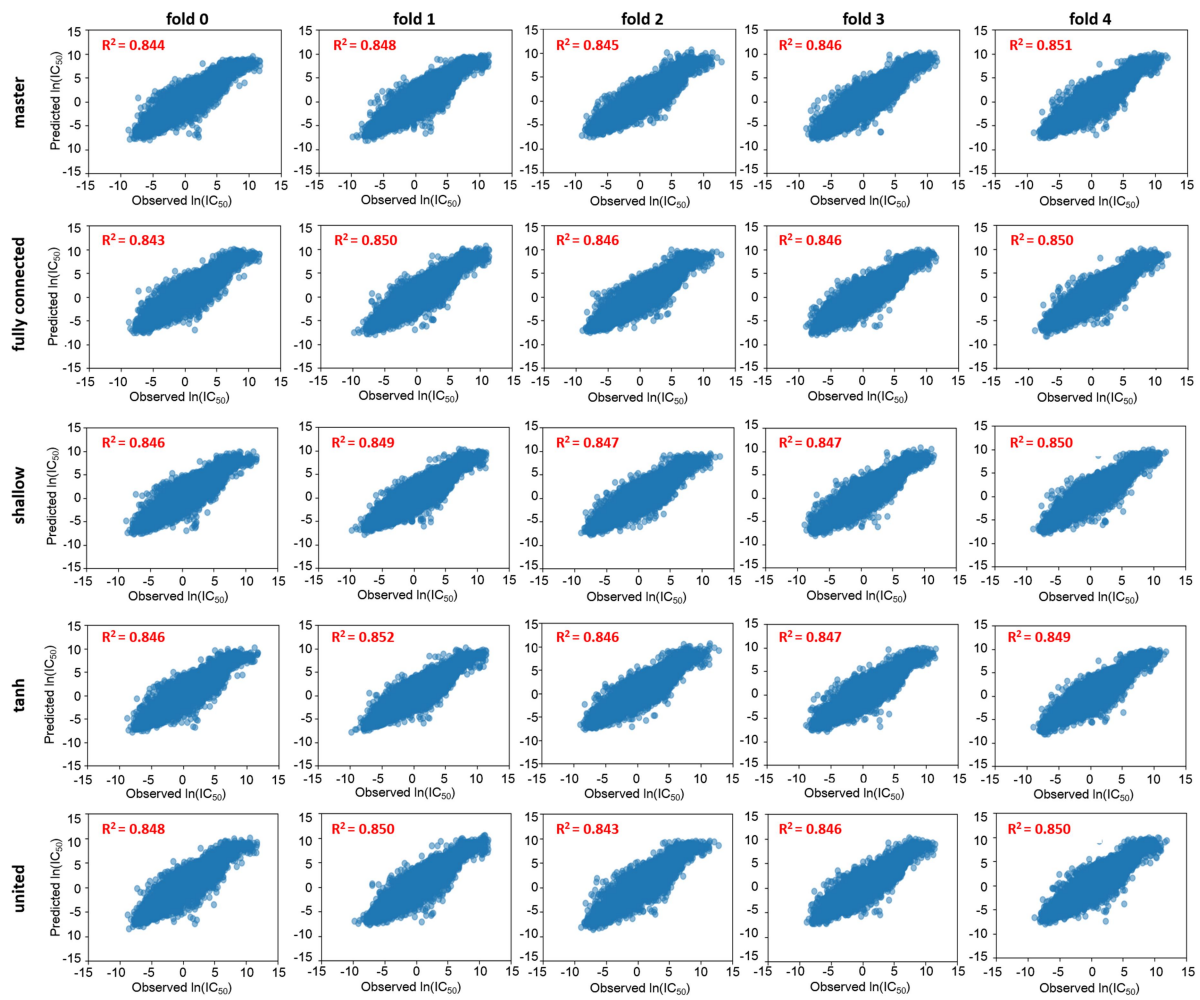

The performance of five independent models of CDRscan were evaluated by five-fold cross validation. The total data sets were randomly split into five equal sized subsamples. Each model was trained with data sets from four of the subsamples, leaving one subsample as a test set. The R<sup>2</sup> was then computed. This process was repeated four additional times, each time leaving different subgroup as a test set.

Continues on the next page

Supplementary Table S1. Architectures of five models of CDRscan.

**Master**

| Layer                   | Filter    | Pooling | Stride | Dense | Dropout | Activation Function | Output Shape | Param # |
|-------------------------|-----------|---------|--------|-------|---------|---------------------|--------------|---------|
| <b>Genomic profile</b>  |           |         |        |       |         |                     |              |         |
| Convolution             | (700, 50) | -       | 5      | -     | -       | tanh                | (5,526, 50)  | 35,050  |
| Max pooling             | -         | 5       | -      | -     | -       | -                   | (1,105, 50)  | -       |
| Convolution             | (5, 30)   | -       | 2      | -     | -       | relu                | (551, 30)    | 7,530   |
| Max pooling             | -         | 10      | -      | -     | -       | -                   | (55,30)      | -       |
| Flatten                 | -         | -       | -      | -     | -       | -                   | 1,650        | -       |
| Dense                   | -         | -       | -      | 100   | -       | relu                | 100          | 165,100 |
| Dropout                 | -         | -       | -      | -     | 0.1     | -                   | 100          | -       |
| <b>Chemical profile</b> |           |         |        |       |         |                     |              |         |
| Convolution             | (200, 50) | -       | 3      | -     | -       | tanh                | (958, 50)    | 10,050  |
| Max pooling             | -         | 5       | -      | -     | -       | -                   | (191, 50)    | -       |
| Convolution             | (50, 30)  | -       | 5      | -     | -       | relu                | (29, 30)     | 75,030  |
| Max pooling             | -         | 10      | -      | -     | -       | -                   | (2, 30)      | -       |
| Flatten                 | -         | -       | -      | -     | -       | -                   | 60           | -       |
| Dense                   | -         | -       | -      | 100   | -       | relu                | 100          | 6,100   |
| Dropout                 | -         | -       | -      | -     | 0.1     | -                   | 100          | -       |
| <b>Merged</b>           |           |         |        |       |         |                     |              |         |
| Concatenate             | -         | -       | -      | -     | -       | -                   | 200          | -       |
| Dense                   | -         | -       | -      | 300   | -       | tanh                | 300          | 60,300  |
| Dropout                 | -         | -       | -      | -     | 0.1     | -                   | 300          | -       |
| Convolution             | (150, 30) | -       | 1      | -     | -       | relu                | (151, 30)    | 4,530   |
| Max pooling             | -         | 2       | -      | -     | -       | -                   | (75, 30)     | -       |
| Convolution             | (5, 10)   | -       | 1      | -     | -       | relu                | (71, 10)     | 1,510   |
| Max pooling             | -         | 3       | -      | -     | -       | -                   | (23, 10)     | -       |
| Convolution             | (5, 5)    | -       | 1      | -     | -       | relu                | (19, 5)      | 255     |
| Max pooling             | -         | 3       | -      | -     | -       | -                   | (6, 5)       | -       |
| Dropout                 | -         | -       | -      | -     | 0.1     | -                   | (6, 5)       | -       |
| Flatten                 | -         | -       | -      | -     | -       | -                   | 30           | -       |
| Dropout                 | -         | -       | -      | -     | 0.2     | -                   | 30           | -       |
| Dense                   | -         | -       | -      | 1     | -       | linear              | 1            | 31      |
| <b>Total</b>            |           |         |        |       |         |                     |              | 365,486 |

Continues on the next page

## Fully connected

| Layer                   | Filter    | Pooling | Stride | Dense | Dropout | Activation Function | Output Shape | Param # |
|-------------------------|-----------|---------|--------|-------|---------|---------------------|--------------|---------|
| <b>Genomic profile</b>  |           |         |        |       |         |                     |              |         |
| Convolution             | (700, 50) | -       | 5      | -     | -       | tanh                | (5,526, 50)  | 35,050  |
| Max pooling             | -         | 5       | -      | -     | -       | -                   | (1,105, 50)  | -       |
| Convolution             | (5, 30)   | -       | 2      | -     | -       | relu                | (551, 30)    | 7,530   |
| Max pooling             | -         | 10      | -      | -     | -       | -                   | (55,30)      | -       |
| Flatten                 | -         | -       | -      | -     | -       | -                   | 1650         | -       |
| Dense                   | -         | -       | -      | 100   | -       | relu                | 100          | 165,100 |
| Dropout                 | -         | -       | -      | -     | 0.1     | -                   | 100          | -       |
| <b>Chemical profile</b> |           |         |        |       |         |                     |              |         |
| Convolution             | (200, 50) | -       | 3      | -     | -       | tanh                | (958, 50)    | 10,050  |
| Max pooling             | -         | 5       | -      | -     | -       | -                   | (191, 50)    | -       |
| Convolution             | (50, 30)  | -       | 5      | -     | -       | relu                | (29, 30)     | 75,030  |
| Max pooling             | -         | 10      | -      | -     | -       | -                   | (2, 30)      | -       |
| Flatten                 | -         | -       | -      | -     | -       | -                   | 60           | -       |
| Dense                   | -         | -       | -      | 100   | -       | relu                | 100          | 6,100   |
| Dropout                 | -         | -       | -      | -     | 0.1     | -                   | 100          | -       |
| <b>Merged</b>           |           |         |        |       |         |                     |              |         |
| Concatenate             | -         | -       | -      | -     | -       | -                   | 200          | -       |
| Dense                   | -         | -       | -      | 300   | -       | tanh                | 300          | 60,300  |
| Dropout                 | -         | -       | -      | -     | 0.1     | -                   | 300          | -       |
| Convolution             | (150, 30) | -       | 1      | -     | -       | relu                | (151, 30)    | 4,530   |
| Max pooling             | -         | 2       | -      | -     | -       | -                   | (75, 30)     | -       |
| Convolution             | (5, 10)   | -       | 1      | -     | -       | relu                | (71, 10)     | 1,510   |
| Max pooling             | -         | 3       | -      | -     | -       | -                   | (23, 10)     | -       |
| Convolution             | (5, 5)    | -       | 1      | -     | -       | relu                | (19, 5)      | 255     |
| Max pooling             | -         | 3       | -      | -     | -       | -                   | (6, 5)       | -       |
| Dropout                 | -         | -       | -      | -     | 0.1     | -                   | (6, 5)       | -       |
| Flatten                 | -         | -       | -      | -     | -       | -                   | 30           | -       |
| Dense                   | -         | -       | -      | 40    | -       | relu                | 40           | 1,240   |
| Dropout                 | -         | -       | -      | -     | 0.2     | -                   | 40           | -       |
| Dense                   | -         | -       | -      | 10    | -       | relu                | 10           | 410     |
| Dropout                 | -         | -       | -      | -     | 0.2     | -                   | 10           | -       |
| Dense                   | -         | -       | -      | 1     | -       | linear              | 1            | 11      |
| Total                   |           |         |        |       |         |                     |              | 367,116 |

Continues on the next page

## Shallow

| Layer                   | Filter    | Pooling | Stride | Dense | Dropout | Activation Function | Output Shape | Param #   |
|-------------------------|-----------|---------|--------|-------|---------|---------------------|--------------|-----------|
| <b>Genomic profile</b>  |           |         |        |       |         |                     |              |           |
| Convolution             | (700, 64) | -       | 5      | -     | -       | tanh                | (5,526, 64)  | 44,864    |
| Max pooling             | -         | 5       | -      | -     | -       | -                   | (1,105, 64)  | -         |
| Flatten                 | -         | -       | -      | -     | -       | -                   | 70,720       | -         |
| Dense                   | -         | -       | -      | 100   | -       | relu                | 100          | 7,072,100 |
| Dropout                 | -         | -       | -      | -     | 0.1     | -                   | 100          | -         |
| <b>Chemical profile</b> |           |         |        |       |         |                     |              |           |
| Convolution             | (200, 64) | -       | 3      | -     | -       | tanh                | (958, 64)    | 12,864    |
| Max pooling             | -         | 5       | -      | -     | -       | -                   | (191, 64)    | -         |
| Flatten                 | -         | -       | -      | -     | -       | -                   | 12,224       | -         |
| Dense                   | -         | -       | -      | 100   | -       | relu                | 100          | 1,222,500 |
| Dropout                 | -         | -       | -      | -     | 0.1     | -                   | 100          | -         |
| <b>Merged</b>           |           |         |        |       |         |                     |              |           |
| Concatenate             | -         | -       | -      | -     | -       | -                   | 200          | -         |
| Dense                   | -         | -       | -      | 300   | -       | tanh                | 300          | 60,300    |
| Dropout                 | -         | -       | -      | -     | 0.1     | -                   | 300          | -         |
| Convolution             | (150, 30) | -       | 1      | -     | -       | relu                | (151, 30)    | 4,530     |
| Max pooling             | -         | 2       | -      | -     | -       | -                   | (75, 30)     | -         |
| Convolution             | (5, 10)   | -       | 1      | -     | -       | relu                | (71, 10)     | 1,510     |
| Max pooling             | -         | 3       | -      | -     | -       | -                   | (23, 10)     | -         |
| Dropout                 | -         | -       | -      | -     | 0.1     | -                   | (23, 10)     | -         |
| Flatten                 | -         | -       | -      | -     | -       | -                   | 230          | -         |
| Dense                   | -         | -       | -      | 40    | -       | -                   | 40           | 9,240     |
| Dropout                 | -         | -       | -      | -     | 0.2     | -                   | 40           | -         |
| Dense                   | -         | -       | -      | 1     | -       | linear              | 1            | 41        |
| Total                   |           |         |        |       |         |                     |              | 8,427,949 |

Continues on the next page

## Tanh

| Layer                   | Filter    | Pooling | Stride | Dense | Dropout | Activation Function | Output Shape | Param # |
|-------------------------|-----------|---------|--------|-------|---------|---------------------|--------------|---------|
| <b>Genomic profile</b>  |           |         |        |       |         |                     |              |         |
| Batch Normalization     | -         | -       | -      | -     | -       | -                   | (28,328,1)   | 4       |
| Convolution             | (700, 50) | -       | 5      | -     | -       | tanh                | (5,526, 50)  | 35,050  |
| Max pooling             | -         | 5       | -      | -     | -       | -                   | (1,105, 50)  | -       |
| Convolution             | (5, 30)   | -       | 2      | -     | -       | relu                | (551, 30)    | 7,530   |
| Max pooling             | -         | 10      | -      | -     | -       | -                   | (55,30)      | -       |
| Flatten                 | -         | -       | -      | -     | -       | -                   | 1650         | -       |
| Dense                   | -         | -       | -      | 100   | -       | relu                | 100          | 165,100 |
| Dropout                 | -         | -       | -      | -     | 0.1     | -                   | 100          | -       |
| <b>Chemical profile</b> |           |         |        |       |         |                     |              |         |
| Batch Normalization     | -         | -       | -      | -     | -       | -                   | (3,072,1)    | 4       |
| Convolution             | (200, 50) | -       | 3      | -     | -       | tanh                | (958, 50)    | 10,050  |
| Max pooling             | -         | 5       | -      | -     | -       | -                   | (191, 50)    | -       |
| Convolution             | (50, 30)  | -       | 5      | -     | -       | relu                | (29, 30)     | 75,030  |
| Max pooling             | -         | 10      | -      | -     | -       | -                   | (2, 30)      | -       |
| Flatten                 | -         | -       | -      | -     | -       | -                   | 60           | -       |
| Dense                   | -         | -       | -      | 100   | -       | relu                | 100          | 6,100   |
| Dropout                 | -         | -       | -      | -     | 0.1     | -                   | 100          | -       |
| <b>Merged</b>           |           |         |        |       |         |                     |              |         |
| Concatenate             | -         | -       | -      | -     | -       | -                   | 200          | -       |
| Dense                   | -         | -       | -      | 300   | -       | tanh                | 300          | 60,300  |
| Dropout                 | -         | -       | -      | -     | 0.1     | -                   | 300          | -       |
| Convolution             | (150, 30) | -       | 1      | -     | -       | relu                | (151, 30)    | 4,530   |
| Max pooling             | -         | 2       | -      | -     | -       | -                   | (75, 30)     | -       |
| Convolution             | (5, 10)   | -       | 1      | -     | -       | relu                | (71, 10)     | 1,510   |
| Max pooling             | -         | 3       | -      | -     | -       | -                   | (23, 10)     | -       |
| Convolution             | (5, 5)    | -       | 1      | -     | -       | relu                | (19, 5)      | 255     |
| Max pooling             | -         | 3       | -      | -     | -       | -                   | (6, 5)       | -       |
| Dropout                 | -         | -       | -      | -     | 0.1     | -                   | (6, 5)       | -       |
| Flatten                 | -         | -       | -      | -     | -       | -                   | 30           | -       |
| Dense                   | -         | -       | -      | 40    | -       | relu                | 40           | 1,240   |
| Dropout                 | -         | -       | -      | -     | 0.2     | -                   | 40           | -       |
| Dense                   | -         | -       | -      | 10    | -       | relu                | 10           | 410     |
| Dropout                 | -         | -       | -      | -     | 0.2     | -                   | 10           | -       |
| Dense                   | -         | -       | -      | 1     | -       | tanh                | 1            | 11      |
| Tatal                   |           |         |        |       |         |                     |              | 367,124 |

Continues on the next page

## Unified

| Layer       | Filter    | Pooling | Stride | Dense | Dropout | Activation Function | Output Shape | Param # |
|-------------|-----------|---------|--------|-------|---------|---------------------|--------------|---------|
| Convolution | (700, 50) | -       | 5      | -     | -       | tanh                | (6,141, 50)  | 35,050  |
| Max pooling | -         | 5       | -      | -     | -       | -                   | (1,228, 50)  | -       |
| Convolution | (5, 30)   | -       | 2      | -     | -       | relu                | (612, 30)    | 7,530   |
| Max pooling | -         | 10      | -      | -     | -       | -                   | (61,30)      | -       |
| Flatten     | -         | -       | -      | -     | -       | -                   | 1830         | -       |
| Dense       | -         | -       | -      | 100   | -       | relu                | 100          | 183,100 |
| Dropout     | -         | -       | -      | -     | 0.1     | -                   | 100          | -       |
| Dense       | -         | -       | -      | 300   | -       | tanh                | 300          | 30,300  |
| Dropout     | -         | -       | -      | -     | 0.1     | -                   | 300          | -       |
| Convolution | (150, 30) | -       | 1      | -     | -       | relu                | (151, 30)    | 4,530   |
| Max pooling | -         | 2       | -      | -     | -       | -                   | (75, 30)     | -       |
| Convolution | (5, 10)   | -       | 1      | -     | -       | relu                | (71, 10)     | 1,510   |
| Max pooling | -         | 3       | -      | -     | -       | -                   | (23, 10)     | -       |
| Convolution | (5, 5)    | -       | 1      | -     | -       | relu                | (19, 5)      | 255     |
| Max pooling | -         | 3       | -      | -     | -       | -                   | (6, 5)       | -       |
| Dropout     | -         | -       | -      | -     | 0.1     | -                   | (6,5)        | -       |
| Flatten     | -         | -       | -      | -     | -       | -                   | 30           | -       |
| Dropout     | -         | -       | -      | -     | 0.2     | -                   | 30           | -       |
| Dense       | -         | -       | -      | 1     | -       | linear              | 1            | 31      |
| Total       |           |         |        |       |         |                     |              | 262,306 |

Continues on the next page

Supplementary Table S2. List of 787 COSMIC cell lines used for training and validation of CDRscan

| No | COSMIC ID | Cell line name   | Cancer Type | No | COSMIC ID | Cell line name | Cancer Type | No  | COSMIC ID | Cell line name   | Cancer Type |
|----|-----------|------------------|-------------|----|-----------|----------------|-------------|-----|-----------|------------------|-------------|
| 1  | 910944    | ALL-PO           | ALL         | 49 | 949093    | BT-483         | BRCA        | 97  | 687505    | C-33-A           | CECSC       |
| 2  | 1295740   | ALL-SIL          | ALL         | 50 | 905951    | BT-549         | BRCA        | 98  | 687506    | C-4-I            | CECSC       |
| 3  | 910687    | ATN-1            | ALL         | 51 | 906826    | CAL-120        | BRCA        | 99  | 924107    | CAL-39           | CECSC       |
| 4  | 906763    | BE-13            | ALL         | 52 | 924106    | CAL-148        | BRCA        | 100 | 906824    | Ca-Ski           | CECSC       |
| 5  | 905952    | CCRF-CEM         | ALL         | 53 | 910927    | CAL-51         | BRCA        | 101 | 906843    | DoTe2-4510       | CECSC       |
| 6  | 1297446   | DND-41           | ALL         | 54 | 910852    | CAL-85-1       | BRCA        | 102 | 1298134   | HeLa             | CECSC       |
| 7  | 906877    | GR-ST            | ALL         | 55 | 946382    | CAMA-1         | BRCA        | 103 | 907068    | HT-3             | CECSC       |
| 8  | 949153    | HAL-01           | ALL         | 56 | 906812    | COLO-824       | BRCA        | 104 | 687514    | ME-180           | CECSC       |
| 9  | 998184    | Jurkat           | ALL         | 57 | 906844    | DU-4475        | BRCA        | 105 | 1240179   | MS751            | CECSC       |
| 10 | 907272    | KARPAS-45        | ALL         | 58 | 906851    | EFM-19         | BRCA        | 106 | 949154    | OMC-1            | CECSC       |
| 11 | 907277    | KE-37            | ALL         | 59 | 1290798   | EFM-192A       | BRCA        | 107 | 930297    | SiHa             | CECSC       |
| 12 | 907787    | LC4-1            | ALL         | 60 | 906862    | EVSA-T         | BRCA        | 108 | 1240212   | SISO             | CECSC       |
| 13 | 907789    | LOUCY            | ALL         | 61 | 749710    | HCC1143        | BRCA        | 109 | 930298    | SKG-IIIa         | CECSC       |
| 14 | 908146    | MOLT-13          | ALL         | 62 | 749711    | HCC1187        | BRCA        | 110 | 724839    | SW756            | CECSC       |
| 15 | 908147    | MOLT-16          | ALL         | 63 | 749712    | HCC1395        | BRCA        | 111 | 910700    | C2BBe1           | COAD_READ   |
| 16 | 905958    | MOLT-4           | ALL         | 64 | 907045    | HCC1419        | BRCA        | 112 | 924108    | CaR-1            | COAD_READ   |
| 17 | 1330960   | MY-M12           | ALL         | 65 | 1290905   | HCC1428        | BRCA        | 113 | 1240123   | CCK-81           | COAD_READ   |
| 18 | 909251    | P12-<br>ICHIKAWA | ALL         | 66 | 1303900   | HCC1500        | BRCA        | 114 | 1290769   | CL-11            | COAD_READ   |
| 19 | 909252    | P30-OHK          | ALL         | 67 | 907046    | HCC1569        | BRCA        | 115 | 1290771   | CL-34            | COAD_READ   |
| 20 | 909260    | PF-382           | ALL         | 68 | 749713    | HCC1599        | BRCA        | 116 | 1240124   | CL-40            | COAD_READ   |
| 21 | 909702    | RPMI-8402        | ALL         | 69 | 749714    | HCC1937        | BRCA        | 117 | 905961    | COLO-205         | COAD_READ   |
| 22 | 909703    | RS4-11           | ALL         | 70 | 749709    | HCC1954        | BRCA        | 118 | 910569    | COLO-320-<br>HSR | COAD_READ   |
| 23 | 1247871   | SUP-B15          | ALL         | 71 | 1290906   | HCC202         | BRCA        | 119 | 910689    | COLO-678         | COAD_READ   |
| 24 | 909743    | SUP-T1           | ALL         | 72 | 749715    | HCC2157        | BRCA        | 120 | 910554    | CW-2             | COAD_READ   |
| 25 | 909762    | TALL-1           | ALL         | 73 | 749716    | HCC2218        | BRCA        | 121 | 1789883   | DIFI             | COAD_READ   |
| 26 | 946358    | YT               | ALL         | 74 | 749717    | HCC38          | BRCA        | 122 | 907291    | GP5d             | COAD_READ   |
| 27 | 687452    | 5637             | BLCA        | 75 | 907048    | HCC70          | BRCA        | 123 | 905971    | HCC2998          | COAD_READ   |
| 28 | 906798    | 639-V            | BLCA        | 76 | 1290922   | HDQ-P1         | BRCA        | 124 | 1290907   | HCC-56           | COAD_READ   |
| 29 | 906797    | 647-V            | BLCA        | 77 | 905957    | Hs-578-T       | BRCA        | 125 | 905936    | HCT-116          | COAD_READ   |
| 30 | 910926    | BFTC-905         | BLCA        | 78 | 1298157   | JIMT-1         | BRCA        | 126 | 905937    | HCT-15           | COAD_READ   |
| 31 | 1290730   | CAL-29           | BLCA        | 79 | 905946    | MCF7           | BRCA        | 127 | 907289    | HT-115           | COAD_READ   |
| 32 | 753552    | DSH1             | BLCA        | 80 | 925338    | MDA-MB-157     | BRCA        | 128 | 905939    | HT-29            | COAD_READ   |
| 33 | 907065    | HT-1197          | BLCA        | 81 | 908120    | MDA-MB-175-VII | BRCA        | 129 | 907287    | HT55             | COAD_READ   |
| 34 | 907066    | HT-1376          | BLCA        | 82 | 905960    | MDA-MB-231     | BRCA        | 130 | 905989    | KM12             | COAD_READ   |
| 35 | 753566    | J82              | BLCA        | 83 | 1330941   | MDA-MB-330     | BRCA        | 131 | 907790    | LoVo             | COAD_READ   |
| 36 | 907312    | KU-19-19         | BLCA        | 84 | 908121    | MDA-MB-361     | BRCA        | 132 | 917486    | LS-1034          | COAD_READ   |
| 37 | 753584    | LB831-BLC        | BLCA        | 85 | 924240    | MDA-MB-415     | BRCA        | 133 | 907792    | LS-123           | COAD_READ   |
| 38 | 909704    | RT-112           | BLCA        | 86 | 1240172   | MDA-MB-436     | BRCA        | 134 | 998189    | LS-180           | COAD_READ   |
| 39 | 687455    | RT4              | BLCA        | 87 | 908122    | MDA-MB-453     | BRCA        | 135 | 907794    | LS-411N          | COAD_READ   |
| 40 | 909749    | SW1710           | BLCA        | 88 | 908123    | MDA-MB-468     | BRCA        | 136 | 907795    | LS-513           | COAD_READ   |
| 41 | 687457    | SW780            | BLCA        | 89 | 910948    | MFM-223        | BRCA        | 137 | 1240173   | MDST8            | COAD_READ   |
| 42 | 724812    | T-24             | BLCA        | 90 | 908151    | MRK-nu-1       | BRCA        | 138 | 908442    | NCI-H508         | COAD_READ   |
| 43 | 687459    | TCCSUP           | BLCA        | 91 | 909256    | OCUB-M         | BRCA        | 139 | 908482    | NCI-H630         | COAD_READ   |
| 44 | 724838    | UM-UC-3          | BLCA        | 92 | 905945    | T47D           | BRCA        | 140 | 908458    | NCI-H716         | COAD_READ   |
| 45 | 909780    | VM-CUB-1         | BLCA        | 93 | 910910    | UACC-812       | BRCA        | 141 | 908457    | NCI-H747         | COAD_READ   |
| 46 | 910704    | AU565            | BRCA        | 94 | 909778    | UACC-893       | BRCA        | 142 | 909263    | RCM-1            | COAD_READ   |
| 47 | 906801    | BT-20            | BRCA        | 95 | 1303911   | YMB-1-E        | BRCA        | 143 | 909698    | RKO              | COAD_READ   |
| 48 | 946359    | BT-474           | BRCA        | 96 | 909907    | ZR-75-30       | BRCA        | 144 | 909718    | SK-CO-1          | COAD_READ   |

Continues on the next page



| No  | COSMIC ID | Cell line name | Cancer Type | No  | COSMIC ID | Cell line name | Cancer Type | No  | COSMIC ID | Cell line name | Cancer Type |
|-----|-----------|----------------|-------------|-----|-----------|----------------|-------------|-----|-----------|----------------|-------------|
| 145 | 1659823   | SNU-1040       | COAD_READ   | 194 | 909773    | TUR            | DLBC        | 243 | 946372    | D-423MG        | GBM         |
| 146 | 1659928   | SNU-175        | COAD_READ   | 195 | 1331048   | VAL            | DLBC        | 244 | 753549    | D-542MG        | GBM         |
| 147 | 1659929   | SNU-283        | COAD_READ   | 196 | 1331050   | WSU-DLCL2      | DLBC        | 245 | 946377    | D-566MG        | GBM         |
| 148 | 1660034   | SNU-407        | COAD_READ   | 197 | 906817    | COLO-680N      | ESCA        | 246 | 906835    | DBTRG-05MG     | GBM         |
| 149 | 1660035   | SNU-61         | COAD_READ   | 198 | 753555    | EC-GI-10       | ESCA        | 247 | 906839    | DK-MG          | GBM         |
| 150 | 1660036   | SNU-81         | COAD_READ   | 199 | 1503366   | ESO26          | ESCA        | 248 | 687568    | GB-1           | GBM         |
| 151 | 910905    | SNU-C1         | COAD_READ   | 200 | 1503367   | ESO51          | ESCA        | 249 | 906873    | GMS-10         | GBM         |
| 152 | 909740    | SNU-C2B        | COAD_READ   | 201 | 1503361   | FLO-1          | ESCA        | 250 | 907313    | KS-1           | GBM         |
| 153 | 1674021   | SNU-C5         | COAD_READ   | 202 | 753559    | HCE-4          | ESCA        | 251 | 1240168   | LN-18          | GBM         |
| 154 | 909746    | SW1116         | COAD_READ   | 203 | 1503368   | KYAE-1         | ESCA        | 252 | 1240169   | LN-229         | GBM         |
| 155 | 909747    | SW1417         | COAD_READ   | 204 | 753573    | KYSE-140       | ESCA        | 253 | 910694    | LN-405         | GBM         |
| 156 | 909748    | SW1463         | COAD_READ   | 205 | 907317    | KYSE-150       | ESCA        | 254 | 1240170   | LNZTA3W T4     | GBM         |
| 157 | 909751    | SW48           | COAD_READ   | 206 | 907318    | KYSE-180       | ESCA        | 255 | 949094    | M059J          | GBM         |
| 158 | 905962    | SW620          | COAD_READ   | 207 | 1240167   | KYSE-220       | ESCA        | 256 | 909712    | SF126          | GBM         |
| 159 | 909755    | SW837          | COAD_READ   | 208 | 907319    | KYSE-270       | ESCA        | 257 | 905986    | SF268          | GBM         |
| 160 | 909757    | SW948          | COAD_READ   | 209 | 753574    | KYSE-410       | ESCA        | 258 | 905985    | SF295          | GBM         |
| 161 | 909761    | T84            | COAD_READ   | 210 | 907320    | KYSE-450       | ESCA        | 259 | 909729    | SK-MG-1        | GBM         |
| 162 | 910935    | A3-KAW         | DLBC        | 211 | 1298222   | KYSE-50        | ESCA        | 260 | 905982    | SNB75          | GBM         |
| 163 | 910934    | A4-Fuk         | DLBC        | 212 | 907321    | KYSE-510       | ESCA        | 261 | 909745    | SW1088         | GBM         |
| 164 | 910919    | BC-1           | DLBC        | 213 | 753575    | KYSE-520       | ESCA        | 262 | 687586    | T98G           | GBM         |
| 165 | 910918    | BC-3           | DLBC        | 214 | 753576    | KYSE-70        | ESCA        | 263 | 687588    | U-118-MG       | GBM         |
| 166 | 906807    | CRO-AP2        | DLBC        | 215 | 1503363   | OACM5-1        | ESCA        | 264 | 905983    | U251           | GBM         |
| 167 | 949088    | CTB-1          | DLBC        | 216 | 1503362   | OACp4C         | ESCA        | 265 | 687590    | U-87-MG        | GBM         |
| 168 | 906832    | DB             | DLBC        | 217 | 910079    | OE19           | ESCA        | 266 | 909905    | YH-13          | GBM         |
| 169 | 906842    | DOHH-2         | DLBC        | 218 | 1298359   | OE21           | ESCA        | 267 | 687592    | YKG-1          | GBM         |
| 170 | 1297449   | Farage         | DLBC        | 219 | 910549    | OE33           | ESCA        | 268 | 753531    | BB30-HNC       | HNSC        |
| 171 | 1303897   | GRANTA-519     | DLBC        | 220 | 1503365   | SK-GT-4        | ESCA        | 269 | 753532    | BB49-HNC       | HNSC        |
| 172 | 907063    | HT             | DLBC        | 221 | 753621    | TE-1           | ESCA        | 270 | 753535    | BHY            | HNSC        |
| 173 | 1327765   | JEKO-1         | DLBC        | 222 | 753622    | TE-10          | ESCA        | 271 | 1290724   | BICR10         | HNSC        |
| 174 | 1327768   | JM1            | DLBC        | 223 | 946354    | TE-11          | ESCA        | 272 | 1240121   | BICR22         | HNSC        |
| 175 | 1327769   | JSC-1          | DLBC        | 224 | 946356    | TE-12          | ESCA        | 273 | 1290725   | BICR31         | HNSC        |
| 176 | 1327773   | KARPAS-1106P   | DLBC        | 225 | 753614    | TE-15          | ESCA        | 274 | 1240122   | BICR78         | HNSC        |
| 177 | 907274    | KARPAS-422     | DLBC        | 226 | 1503371   | TE-4           | ESCA        | 275 | 753538    | Ca9-22         | HNSC        |
| 178 | 907799    | MC116          | DLBC        | 227 | 735784    | TE-5           | ESCA        | 276 | 910916    | CAL-27         | HNSC        |
| 179 | 1330982   | NU-DUL-1       | DLBC        | 228 | 946355    | TE-6           | ESCA        | 277 | 753541    | CAL-33         | HNSC        |
| 180 | 1330984   | OCI-LY-19      | DLBC        | 229 | 753623    | TE-8           | ESCA        | 278 | 906837    | Detroit562     | HNSC        |
| 181 | 1659819   | OCI-LY7        | DLBC        | 230 | 946353    | TE-9           | ESCA        | 279 | 910936    | DOK            | HNSC        |
| 182 | 1330995   | RC-K8          | DLBC        | 231 | 1299064   | T-T            | ESCA        | 280 | 906863    | FADU           | HNSC        |
| 183 | 910861    | RL             | DLBC        | 232 | 687561    | 42-MG-BA       | GBM         | 281 | 907059    | HN             | HNSC        |
| 184 | 1331030   | SC-1           | DLBC        | 233 | 687562    | 8-MG-BA        | GBM         | 282 | 924111    | HO-1-N-1       | HNSC        |
| 185 | 910930    | SCC-3          | DLBC        | 234 | 687563    | A172           | GBM         | 283 | 753561    | HO-1-u-1       | HNSC        |
| 186 | 1331032   | SLVL           | DLBC        | 235 | 910933    | AM-38          | GBM         | 284 | 753562    | HSC-2          | HNSC        |
| 187 | 1331033   | SU-DHL-10      | DLBC        | 236 | 906746    | Becker         | GBM         | 285 | 907061    | HSC-3          | HNSC        |
| 188 | 1331034   | SU-DHL-16      | DLBC        | 237 | 910943    | CAS-1          | GBM         | 286 | 907062    | HSC-4          | HNSC        |
| 189 | 1331035   | SU-DHL-4       | DLBC        | 238 | 906823    | CCF-STTG1      | GBM         | 287 | 1240161   | JHU-011        | HNSC        |
| 190 | 1331036   | SU-DHL-5       | DLBC        | 239 | 946366    | D-245MG        | GBM         | 288 | 1240162   | JHU-022        | HNSC        |
| 191 | 1331037   | SU-DHL-6       | DLBC        | 240 | 946367    | D-247MG        | GBM         | 289 | 1298156   | JHU-029        | HNSC        |
| 192 | 1331038   | SU-DHL-8       | DLBC        | 241 | 946368    | D-263MG        | GBM         | 290 | 1298215   | KON            | HNSC        |
| 193 | 1331045   | TK             | DLBC        | 242 | 946370    | D-392MG        | GBM         | 291 | 753570    | KOSC-2         | HNSC        |

Continues on the next page

| No  | COSMIC ID | Cell line name | Cancer Type | No  | COSMIC ID | Cell line name | Cancer Type | No  | COSMIC ID | Cell line name | Cancer Type |
|-----|-----------|----------------|-------------|-----|-----------|----------------|-------------|-----|-----------|----------------|-------------|
| 292 | 753583    | LB771-HNC      | HNSC        | 340 | 1240224   | VMRC-RCW       | KIRC        | 388 | 907282    | KNS-42         | LGG         |
| 293 | 1298362   | OSC-19         | HNSC        | 341 | 909781    | VMRC-RCZ       | KIRC        | 389 | 924188    | KNS-81-FD      | LGG         |
| 294 | 1240196   | OSC-20         | HNSC        | 342 | 910688    | CESS           | LAML        | 390 | 908144    | MOG-G-CCM      | LGG         |
| 295 | 1240204   | PCI-15A        | HNSC        | 343 | 910566    | CMK            | LAML        | 391 | 908145    | MOG-G-UVW      | LGG         |
| 296 | 1298529   | PCI-30         | HNSC        | 344 | 753548    | CTV-1          | LAML        | 392 | 908449    | NMC-G1         | LGG         |
| 297 | 1240205   | PCI-38         | HNSC        | 345 | 906870    | GDM-1          | LAML        | 393 | 908452    | no-10          | LGG         |
| 298 | 1298531   | PCI-4B         | HNSC        | 346 | 907053    | HEL            | LAML        | 394 | 908450    | no-11          | LGG         |
| 299 | 1240206   | PCI-6A         | HNSC        | 347 | 905938    | HL-60          | LAML        | 395 | 905984    | SF539          | LGG         |
| 300 | 1240207   | PE/CA-PJ15     | HNSC        | 348 | 907275    | KASUMI-1       | LAML        | 396 | 909750    | SW1783         | LGG         |
| 301 | 909700    | RPMI-2650      | HNSC        | 349 | 907278    | KG-1           | LAML        | 397 | 910850    | C3A            | LIHC        |
| 302 | 909708    | SAS            | HNSC        | 350 | 907280    | KMOE-2         | LAML        | 398 | 1240147   | Hep 3B2_1-7    | LIHC        |
| 303 | 1299050   | SAT            | HNSC        | 351 | 1330932   | KO52           | LAML        | 399 | 907057    | HLE            | LIHC        |
| 304 | 910911    | SCC-15         | HNSC        | 352 | 907300    | KY821          | LAML        | 400 | 1298146   | huH-1          | LIHC        |
| 305 | 910701    | SCC-25         | HNSC        | 353 | 1330942   | ME-1           | LAML        | 401 | 907071    | HuH-7          | LIHC        |
| 306 | 910904    | SCC-4          | HNSC        | 354 | 908141    | ML-2           | LAML        | 402 | 1298151   | JHH-1          | LIHC        |
| 307 | 909709    | SCC-9          | HNSC        | 355 | 1330947   | MOLM-13        | LAML        | 403 | 1240157   | JHH-2          | LIHC        |
| 308 | 1299052   | SCC90          | HNSC        | 356 | 1330948   | MOLM-16        | LAML        | 404 | 1240158   | JHH-4          | LIHC        |
| 309 | 1299059   | SKN-3          | HNSC        | 357 | 908148    | MONO-MAC-6     | LAML        | 405 | 1240159   | JHH-6          | LIHC        |
| 310 | 910922    | 769-P          | KIRC        | 358 | 1323913   | NB-4           | LAML        | 406 | 1240160   | JHH-7          | LIHC        |
| 311 | 905947    | 786-0          | KIRC        | 359 | 908448    | NKM-1          | LAML        | 407 | 909719    | SK-HEP-1       | LIHC        |
| 312 | 905948    | A498           | KIRC        | 360 | 908451    | NOMO-1         | LAML        | 408 | 1240216   | SNU-182        | LIHC        |
| 313 | 910920    | A704           | KIRC        | 361 | 910947    | OCI-AML2       | LAML        | 409 | 909736    | SNU-387        | LIHC        |
| 314 | 905950    | ACHN           | KIRC        | 362 | 1290455   | OCI-AML3       | LAML        | 410 | 1240217   | SNU-398        | LIHC        |
| 315 | 753533    | BB65-RCC       | KIRC        | 363 | 1330983   | OCI-AML5       | LAML        | 411 | 909737    | SNU-423        | LIHC        |
| 316 | 910698    | BFTC-909       | KIRC        | 364 | 1330985   | OCI-M1         | LAML        | 412 | 909738    | SNU-449        | LIHC        |
| 317 | 905963    | CAKI-1         | KIRC        | 365 | 909253    | P31-FUJ        | LAML        | 413 | 909739    | SNU-475        | LIHC        |
| 318 | 910952    | CAL-54         | KIRC        | 366 | 1330991   | PL-21          | LAML        | 414 | 1287381   | 201T           | LUAD        |
| 319 | 753558    | HA7-RCC        | KIRC        | 367 | 910545    | QIMR-WIL       | LAML        | 415 | 905949    | A549           | LUAD        |
| 320 | 1298168   | KMRC-1         | KIRC        | 368 | 909715    | SIG-M5         | LAML        | 416 | 906791    | ABC-1          | LUAD        |
| 321 | 1298169   | KMRC-20        | KIRC        | 369 | 909771    | THP-1          | LAML        | 417 | 687777    | Calu-3         | LUAD        |
| 322 | 753577    | LB1047-RCC     | KIRC        | 370 | 910710    | BV-173         | LCML        | 418 | 724859    | Calu-6         | LUAD        |
| 323 | 753578    | LB2241-RCC     | KIRC        | 371 | 910951    | CML-T1         | LCML        | 419 | 906805    | COR-L105       | LUAD        |
| 324 | 753585    | LB996-RCC      | KIRC        | 372 | 906855    | EM-2           | LCML        | 420 | 905970    | EKVX           | LUAD        |
| 325 | 1509073   | NCC010         | KIRC        | 373 | 1327771   | JURL-MK1       | LCML        | 421 | 1503369   | EMC-BAC-1      | LUAD        |
| 326 | 1509074   | NCC021         | KIRC        | 374 | 905940    | K-562          | LCML        | 422 | 1503370   | EMC-BAC-2      | LUAD        |
| 327 | 909250    | OS-RC-2        | KIRC        | 375 | 1330931   | KCL-22         | LCML        | 423 | 1247873   | H3255          | LUAD        |
| 328 | 909974    | RCC10RGB       | KIRC        | 376 | 907311    | KU812          | LCML        | 424 | 1240145   | HCC-44         | LUAD        |
| 329 | 1524418   | RCC-AB         | KIRC        | 377 | 907783    | LAMA-84        | LCML        | 425 | 1290908   | HCC-78         | LUAD        |
| 330 | 1524417   | RCC-ER         | KIRC        | 378 | 908126    | MEG-01         | LCML        | 426 | 1240146   | HCC-827        | LUAD        |
| 331 | 1524414   | RCC-FG2        | KIRC        | 379 | 910544    | RPMI-8866      | LCML        | 427 | 905972    | HOP-62         | LUAD        |
| 332 | 1524415   | RCC-JF         | KIRC        | 380 | 946369    | D-336MG        | LGG         | 428 | 907786    | LC-2-ad        | LUAD        |
| 333 | 1524416   | RCC-JW         | KIRC        | 381 | 946373    | D-502MG        | LGG         | 429 | 753592    | LXF-289        | LUAD        |
| 334 | 1524419   | RCC-MF         | KIRC        | 382 | 906868    | GAMG           | LGG         | 430 | 724866    | NCI-H1355      | LUAD        |
| 335 | 905978    | RXF393         | KIRC        | 383 | 906871    | GI-1           | LGG         | 431 | 1298347   | NCI-H1435      | LUAD        |
| 336 | 905979    | SN12C          | KIRC        | 384 | 907042    | H4             | LGG         | 432 | 687794    | NCI-H1437      | LUAD        |
| 337 | 1240220   | SW156          | KIRC        | 385 | 1240150   | Hs683          | LGG         | 433 | 753600    | NCI-H1563      | LUAD        |
| 338 | 905980    | TK10           | KIRC        | 386 | 907271    | KALS-1         | LGG         | 434 | 1298348   | NCI-H1568      | LUAD        |
| 339 | 905981    | U031           | KIRC        | 387 | 907279    | KINGS-1        | LGG         | 435 | 908472    | NCI-H1573      | LUAD        |

Continues on the next page

| No  | COSMIC ID | Cell line name | Cancer Type | No  | COSMIC ID | Cell line name | Cancer Type | No  | COSMIC ID | Cell line name | Cancer Type |
|-----|-----------|----------------|-------------|-----|-----------|----------------|-------------|-----|-----------|----------------|-------------|
| 436 | 687798    | NCI-H1623      | LUAD        | 484 | 1298226   | LOU-NH91       | LUSC        | 532 | 910567    | CHP-126        | NB          |
| 437 | 687799    | NCI-H1648      | LUAD        | 485 | 1240183   | NCI-H1869      | LUSC        | 533 | 910941    | CHP-134        | NB          |
| 438 | 687800    | NCI-H1650      | LUAD        | 486 | 687815    | NCI-H2170      | LUSC        | 534 | 906820    | CHP-212        | NB          |
| 439 | 910900    | NCI-H1651      | LUAD        | 487 | 905941    | NCI-H226       | LUSC        | 535 | 906872    | GI-ME-N        | NB          |
| 440 | 908473    | NCI-H1666      | LUAD        | 488 | 908443    | NCI-H520       | LUSC        | 536 | 906875    | GOTO           | NB          |
| 441 | 687802    | NCI-H1693      | LUAD        | 489 | 1298538   | RERF-LC-Sq1    | LUSC        | 537 | 907170    | IMR-5          | NB          |
| 442 | 722058    | NCI-H1734      | LUAD        | 490 | 909728    | SK-MES-1       | LUSC        | 538 | 753618    | KELLY          | NB          |
| 443 | 908475    | NCI-H1755      | LUAD        | 491 | 724879    | SW900          | LUSC        | 539 | 924189    | KP-N-RT-BM-1   | NB          |
| 444 | 1298350   | NCI-H1781      | LUAD        | 492 | 1290808   | H2369          | MESO        | 540 | 907314    | KP-N-YN        | NB          |
| 445 | 724868    | NCI-H1792      | LUAD        | 493 | 1290809   | H2373          | MESO        | 541 | 946363    | KP-N-YS        | NB          |
| 446 | 908463    | NCI-H1793      | LUAD        | 494 | 1290810   | H2461          | MESO        | 542 | 949170    | LAN-6          | NB          |
| 447 | 687807    | NCI-H1838      | LUAD        | 495 | 1240131   | H2591          | MESO        | 543 | 908118    | MC-IXC         | NB          |
| 448 | 1240185   | NCI-H1944      | LUAD        | 496 | 1240132   | H2595          | MESO        | 544 | 908135    | MHH-NB-11      | NB          |
| 449 | 924244    | NCI-H1975      | LUAD        | 497 | 1290812   | H2722          | MESO        | 545 | 949179    | NB1            | NB          |
| 450 | 908476    | NCI-H1993      | LUAD        | 498 | 1240134   | H2731          | MESO        | 546 | 949171    | NB10           | NB          |
| 451 | 724873    | NCI-H2009      | LUAD        | 499 | 1290813   | H2795          | MESO        | 547 | 949172    | NB12           | NB          |
| 452 | 1240187   | NCI-H2023      | LUAD        | 500 | 1240135   | H2803          | MESO        | 548 | 949177    | NB13           | NB          |
| 453 | 722045    | NCI-H2030      | LUAD        | 501 | 1240136   | H2804          | MESO        | 549 | 949178    | NB14           | NB          |
| 454 | 687812    | NCI-H2085      | LUAD        | 502 | 1240137   | H2810          | MESO        | 550 | 949175    | NB17           | NB          |
| 455 | 724834    | NCI-H2087      | LUAD        | 503 | 1290814   | H2818          | MESO        | 551 | 949176    | NB5            | NB          |
| 456 | 722046    | NCI-H2122      | LUAD        | 504 | 1240138   | H2869          | MESO        | 552 | 949173    | NB6            | NB          |
| 457 | 687816    | NCI-H2228      | LUAD        | 505 | 1240139   | H290           | MESO        | 553 | 908440    | NB69           | NB          |
| 458 | 724874    | NCI-H2291      | LUAD        | 506 | 1240141   | H513           | MESO        | 554 | 949174    | NB7            | NB          |
| 459 | 905942    | NCI-H23        | LUAD        | 507 | 907173    | IST-MES1       | MESO        | 555 | 1240181   | NB(TU)1-10     | NB          |
| 460 | 687819    | NCI-H2342      | LUAD        | 508 | 908150    | MPP-89         | MESO        | 556 | 908447    | NH-12          | NB          |
| 461 | 687820    | NCI-H2347      | LUAD        | 509 | 908152    | MSTO-211H      | MESO        | 557 | 753620    | SIMA           | NB          |
| 462 | 687821    | NCI-H2405      | LUAD        | 510 | 688058    | NCI-H2052      | MESO        | 558 | 724828    | SK-N-AS        | NB          |
| 463 | 1240190   | NCI-H3122      | LUAD        | 511 | 908462    | NCI-H2452      | MESO        | 559 | 688086    | SK-N-DZ        | NB          |
| 464 | 905967    | NCI-H322M      | LUAD        | 512 | 908470    | NCI-H28        | MESO        | 560 | 688087    | SK-N-FI        | NB          |
| 465 | 908465    | NCI-H358       | LUAD        | 513 | 1295741   | AMO-1          | MM          | 561 | 717431    | SK-N-SH        | NB          |
| 466 | 908460    | NCI-H441       | LUAD        | 514 | 906765    | ARH-77         | MM          | 562 | 910780    | TGW            | NB          |
| 467 | 905944    | NCI-H522       | LUAD        | 515 | 1297447   | EJM            | MM          | 563 | 906825    | Caov-3         | OV          |
| 468 | 722066    | NCI-H650       | LUAD        | 516 | 753563    | IM-9           | MM          | 564 | 949090    | Caov-4         | OV          |
| 469 | 910399    | NCI-H838       | LUAD        | 517 | 1327766   | JJN-3          | MM          | 565 | 1479987   | DOV13          | OV          |
| 470 | 753608    | PC-14          | LUAD        | 518 | 1327775   | KARPAS-620     | MM          | 566 | 911905    | EFO-21         | OV          |
| 471 | 1240202   | PC-3 [JPC-3]   | LUAD        | 519 | 1659817   | KMS-11         | MM          | 567 | 1240129   | FU-OV-1        | OV          |
| 472 | 1298537   | RERF-LC-KJ     | LUAD        | 520 | 907281    | KMS-12-BM      | MM          | 568 | 1479988   | Hey            | OV          |
| 473 | 910931    | RERF-LC-MS     | LUAD        | 521 | 924239    | L-363          | MM          | 569 | 905968    | IGROV-1        | OV          |
| 474 | 909721    | SK-LU-1        | LUAD        | 522 | 907791    | LP-1           | MM          | 570 | 1479995   | JHOS-2         | OV          |
| 475 | 724878    | SW1573         | LUAD        | 523 | 683665    | MC-CAR         | MM          | 571 | 1480358   | JHOS-3         | OV          |
| 476 | 713869    | VMRC-LCD       | LUAD        | 524 | 1659818   | MM1S           | MM          | 572 | 1480359   | JHOS-4         | OV          |
| 477 | 753554    | EBC-1          | LUSC        | 525 | 1330950   | MOLP-8         | MM          | 573 | 946360    | OAW-28         | OV          |
| 478 | 753556    | EPLC-272H      | LUSC        | 526 | 724825    | NCI-H929       | MM          | 574 | 910548    | OAW-42         | OV          |
| 479 | 1240142   | HARA           | LUSC        | 527 | 909249    | OPM-2          | MM          | 575 | 909257    | OC-314         | OV          |
| 480 | 1240143   | HCC-15         | LUSC        | 528 | 905964    | RPMI-8226      | MM          | 576 | 1480361   | OV-17R         | OV          |
| 481 | 753569    | KNS-62         | LUSC        | 529 | 753612    | SK-MM-2        | MM          | 577 | 1480362   | OV-56          | OV          |
| 482 | 1298223   | LC-1-sq        | LUSC        | 530 | 753615    | U-266          | MM          | 578 | 1480360   | OV-7           | OV          |
| 483 | 687787    | LK-2           | LUSC        | 531 | 753616    | BE2-M17        | NB          | 579 | 1240197   | OV-90          | OV          |

Continues on the next page

| No  | COSMIC ID | Cell line name | Cancer Type | No  | COSMIC ID | Cell line name | Cancer Type | No  | COSMIC ID | Cell line name | Cancer Type |
|-----|-----------|----------------|-------------|-----|-----------|----------------|-------------|-----|-----------|----------------|-------------|
| 580 | 1480364   | OVCA420        | OV          | 629 | 1297438   | COR-L303       | SCLC        | 678 | 908483    | NCI-H524       | SCLC        |
| 581 | 1480367   | OVCA433        | OV          | 630 | 687980    | COR-L311       | SCLC        | 679 | 688025    | NCI-H526       | SCLC        |
| 582 | 905933    | OVCAR-3        | OV          | 631 | 1322212   | COR-L32        | SCLC        | 680 | 688026    | NCI-H64        | SCLC        |
| 583 | 905990    | OVCAR-4        | OV          | 632 | 906808    | COR-L88        | SCLC        | 681 | 688027    | NCI-H69        | SCLC        |
| 584 | 905969    | OVCAR-5        | OV          | 633 | 1297439   | COR-L95        | SCLC        | 682 | 1331055   | NCI-H740       | SCLC        |
| 585 | 905991    | OVCAR-8        | OV          | 634 | 753547    | CPC-N          | SCLC        | 683 | 909194    | NCI-H748       | SCLC        |
| 586 | 1240198   | OVISe          | OV          | 635 | 687983    | DMS-114        | SCLC        | 684 | 688031    | NCI-H82        | SCLC        |
| 587 | 1480371   | OVK-18         | OV          | 636 | 687985    | DMS-273        | SCLC        | 685 | 1240192   | NCI-H841       | SCLC        |
| 588 | 1240199   | OVKATE         | OV          | 637 | 907295    | DMS-53         | SCLC        | 686 | 1240193   | NCI-H847       | SCLC        |
| 589 | 1240200   | OVMIU          | OV          | 638 | 753551    | DMS-79         | SCLC        | 687 | 930081    | RERF-LC-FM     | SCLC        |
| 590 | 1298365   | OVTOKO         | OV          | 639 | 1303901   | HCC-33         | SCLC        | 688 | 713885    | SBC-1          | SCLC        |
| 591 | 1480372   | PEO1           | OV          | 640 | 753564    | IST-SL1        | SCLC        | 689 | 753610    | SBC-3          | SCLC        |
| 592 | 905959    | SK-OV-3        | OV          | 641 | 753565    | IST-SL2        | SCLC        | 690 | 713880    | SBC-5          | SCLC        |
| 593 | 909753    | SW626          | OV          | 642 | 753582    | LB647-SCLC     | SCLC        | 691 | 724872    | SHP-77         | SCLC        |
| 594 | 1299070   | TOV-112D       | OV          | 643 | 753588    | LU-134-A       | SCLC        | 692 | 1299062   | SW1271         | SCLC        |
| 595 | 1240222   | TOV-21G        | OV          | 644 | 713899    | LU-135         | SCLC        | 693 | 1287706   | 451Lu          | SKCM        |
| 596 | 1480374   | UWB1.289       | OV          | 645 | 713878    | LU-139         | SCLC        | 694 | 910921    | A101D          | SKCM        |
| 597 | 910702    | AsPC-1         | PAAD        | 646 | 753589    | LU-165         | SCLC        | 695 | 906792    | A2058          | SKCM        |
| 598 | 906693    | BxPC-3         | PAAD        | 647 | 753594    | MS-1           | SCLC        | 696 | 906793    | A375           | SKCM        |
| 599 | 753624    | CAPAN-1        | PAAD        | 648 | 687995    | NCI-H1048      | SCLC        | 697 | 906830    | C32            | SKCM        |
| 600 | 910915    | Capan-2        | PAAD        | 649 | 687997    | NCI-H1092      | SCLC        | 698 | 910853    | CHL-1          | SKCM        |
| 601 | 906821    | CFPAC-1        | PAAD        | 650 | 908468    | NCI-H1105      | SCLC        | 699 | 906818    | COLO-679       | SKCM        |
| 602 | 1290797   | DAN-G          | PAAD        | 651 | 753597    | NCI-H128       | SCLC        | 700 | 1240125   | COLO-783       | SKCM        |
| 603 | 1298136   | HPAC           | PAAD        | 652 | 753599    | NCI-H1304      | SCLC        | 701 | 906814    | COLO-792       | SKCM        |
| 604 | 724869    | HPAF-II        | PAAD        | 653 | 1330964   | NCI-H1341      | SCLC        | 702 | 906813    | COLO-800       | SKCM        |
| 605 | 1298141   | Hs766T         | PAAD        | 654 | 688001    | NCI-H1417      | SCLC        | 703 | 687448    | COLO-829       | SKCM        |
| 606 | 907285    | HuP-T3         | PAAD        | 655 | 908469    | NCI-H1436      | SCLC        | 704 | 753545    | CP50-MEL-B     | SKCM        |
| 607 | 907286    | HuP-T4         | PAAD        | 656 | 910899    | NCI-H146       | SCLC        | 705 | 753546    | CP66-MEL       | SKCM        |
| 608 | 1298216   | KP-1N          | PAAD        | 657 | 1298349   | NCI-H1688      | SCLC        | 706 | 949092    | CP67-MEL       | SKCM        |
| 609 | 1298218   | KP-2           | PAAD        | 658 | 688006    | NCI-H1694      | SCLC        | 707 | 906865    | G-361          | SKCM        |
| 610 | 753572    | KP-4           | PAAD        | 659 | 1240182   | NCI-H1836      | SCLC        | 708 | 910932    | GAK            | SKCM        |
| 611 | 724870    | MIA-PaCa-2     | PAAD        | 660 | 688007    | NCI-H187       | SCLC        | 709 | 1240130   | G-MEL          | SKCM        |
| 612 | 753595    | MZ1-PC         | PAAD        | 661 | 1330972   | NCI-H1876      | SCLC        | 710 | 907058    | HMV-II         | SKCM        |
| 613 | 1298475   | PANC-02-03     | PAAD        | 662 | 1240186   | NCI-H196       | SCLC        | 711 | 1298144   | Hs939-T        | SKCM        |
| 614 | 925346    | PANC-03-27     | PAAD        | 663 | 688010    | NCI-H1963      | SCLC        | 712 | 1298145   | Hs940-T        | SKCM        |
| 615 | 1298476   | PANC-04-03     | PAAD        | 664 | 688011    | NCI-H2029      | SCLC        | 713 | 907067    | HT-144         | SKCM        |
| 616 | 925347    | PANC-08-13     | PAAD        | 665 | 1330973   | NCI-H2066      | SCLC        | 714 | 907169    | IGR-1          | SKCM        |
| 617 | 925348    | PANC-10-05     | PAAD        | 666 | 908480    | NCI-H2081      | SCLC        | 715 | 1240153   | IGR-37         | SKCM        |
| 618 | 1298526   | PA-TU-8902     | PAAD        | 667 | 688013    | NCI-H209       | SCLC        | 716 | 907171    | IPC-298        | SKCM        |
| 619 | 1240201   | PA-TU-8988T    | PAAD        | 668 | 1240189   | NCI-H211       | SCLC        | 717 | 907172    | IST-MEL1       | SKCM        |
| 620 | 1240208   | PL18           | PAAD        | 669 | 688014    | NCI-H2141      | SCLC        | 718 | 1298160   | K2             | SKCM        |
| 621 | 1298533   | PL4            | PAAD        | 670 | 688015    | NCI-H2171      | SCLC        | 719 | 753579    | LB2518-MEL     | SKCM        |
| 622 | 910546    | PSN1           | PAAD        | 671 | 908481    | NCI-H2196      | SCLC        | 720 | 753581    | LB373-MEL-D    | SKCM        |
| 623 | 1240218   | SU8686         | PAAD        | 672 | 688018    | NCI-H2227      | SCLC        | 721 | 905974    | LOXIMV1        | SKCM        |
| 624 | 1240219   | SUIT-2         | PAAD        | 673 | 924241    | NCI-H250       | SCLC        | 722 | 905975    | M14            | SKCM        |
| 625 | 910907    | SW1990         | PAAD        | 674 | 688021    | NCI-H345       | SCLC        | 723 | 908124    | MEL-HO         | SKCM        |
| 626 | 909904    | YAPC           | PAAD        | 675 | 688022    | NCI-H378       | SCLC        | 724 | 908125    | MEL-JUSO       | SKCM        |
| 627 | 910692    | COLO-668       | SCLC        | 676 | 688023    | NCI-H446       | SCLC        | 725 | 908128    | Mewo           | SKCM        |
| 628 | 910937    | COR-L279       | SCLC        | 677 | 753605    | NCI-H510A      | SCLC        | 726 | 925339    | MMAC-SF        | SKCM        |

Continues on the next page

| No  | COSMIC ID | Cell line name | Cancer Type | No  | COSMIC ID | Cell line name | Cancer Type |
|-----|-----------|----------------|-------------|-----|-----------|----------------|-------------|
| 727 | 971777    | MZ2-MEL        | SKCM        | 776 | 906696    | BHT-101        | THCA        |
| 728 | 753596    | MZ7-mel        | SKCM        | 777 | 906828    | CAL-62         | THCA        |
| 729 | 910903    | RPMI-7951      | SKCM        | 778 | 910568    | CGTH-W-1       | THCA        |
| 730 | 909706    | RVH-421        | SKCM        | 779 | 906864    | FTC-133        | THCA        |
| 731 | 909713    | SH-4           | SKCM        | 780 | 924151    | HTC-C3         | THCA        |
| 732 | 909723    | SK-MEL-1       | SKCM        | 781 | 1240154   | IHH-4          | THCA        |
| 733 | 905955    | SK-MEL-2       | SKCM        | 782 | 924238    | K5             | THCA        |
| 734 | 909725    | SK-MEL-24      | SKCM        | 783 | 1298167   | KMH-2          | THCA        |
| 735 | 905954    | SK-MEL-28      | SKCM        | 784 | 1240178   | ML-1           | THCA        |
| 736 | 909724    | SK-MEL-3       | SKCM        | 785 | 930083    | RO82-W-1       | THCA        |
| 737 | 909726    | SK-MEL-30      | SKCM        | 786 | 930299    | TT             | THCA        |
| 738 | 909727    | SK-MEL-31      | SKCM        | 787 | 1240223   | TT2609-C02     | THCA        |
| 739 | 905956    | SK-MEL-5       | SKCM        |     |           |                |             |
| 740 | 905977    | UACC-257       | SKCM        |     |           |                |             |
| 741 | 905976    | UACC-62        | SKCM        |     |           |                |             |
| 742 | 930301    | VMRC-MELG      | SKCM        |     |           |                |             |
| 743 | 909784    | WM-115         | SKCM        |     |           |                |             |
| 744 | 1299078   | WM1552C        | SKCM        |     |           |                |             |
| 745 | 1240226   | WM278          | SKCM        |     |           |                |             |
| 746 | 1299080   | WM35           | SKCM        |     |           |                |             |
| 747 | 1299081   | WM793B         | SKCM        |     |           |                |             |
| 748 | 910924    | 23132-87       | STAD        |     |           |                |             |
| 749 | 906790    | AGS            | STAD        |     |           |                |             |
| 750 | 1290806   | FU97           | STAD        |     |           |                |             |
| 751 | 906869    | GCIY           | STAD        |     |           |                |             |
| 752 | 907055    | HGC-27         | STAD        |     |           |                |             |
| 753 | 1240151   | Hs746T         | STAD        |     |           |                |             |
| 754 | 1322224   | HSC-39         | STAD        |     |           |                |             |
| 755 | 1240155   | IM-95          | STAD        |     |           |                |             |
| 756 | 907276    | KATOIII        | STAD        |     |           |                |             |
| 757 | 908139    | MKN28          | STAD        |     |           |                |             |
| 758 | 925340    | MKN45          | STAD        |     |           |                |             |
| 759 | 924250    | MKN7           | STAD        |     |           |                |             |
| 760 | 908461    | NCI-N87        | STAD        |     |           |                |             |
| 761 | 908444    | NCI-SNU-1      | STAD        |     |           |                |             |
| 762 | 908446    | NCI-SNU-16     | STAD        |     |           |                |             |
| 763 | 908445    | NCI-SNU-5      | STAD        |     |           |                |             |
| 764 | 908455    | NUGC-3         | STAD        |     |           |                |             |
| 765 | 1298357   | NUGC-4         | STAD        |     |           |                |             |
| 766 | 1298358   | OCUM-1         | STAD        |     |           |                |             |
| 767 | 1240209   | RERF-GC-1B     | STAD        |     |           |                |             |
| 768 | 909697    | RF-48          | STAD        |     |           |                |             |
| 769 | 1503364   | SK-GT-2        | STAD        |     |           |                |             |
| 770 | 909770    | TGBC11TKB      | STAD        |     |           |                |             |
| 771 | 1299069   | TMK-1          | STAD        |     |           |                |             |
| 772 | 906795    | 8305C          | THCA        |     |           |                |             |
| 773 | 924102    | 8505C          | THCA        |     |           |                |             |
| 774 | 1290722   | ASH-3          | THCA        |     |           |                |             |
| 775 | 924104    | BCPAP          | THCA        |     |           |                |             |

Supplementary Table S3. List of 229 unique GDSC compounds used for training and validation of CDRscan

| No | Name                | Targets                           | Target pathway                | PubCHEM ID | Sample size |
|----|---------------------|-----------------------------------|-------------------------------|------------|-------------|
| 1  | 681640              | WEE1, CHEK1                       | Cell cycle                    | 10384072   |             |
| 2  | (5Z)-7-Oxozeaenol   | TAK1                              | Other, kinases                | 9863776    | 951         |
| 3  | 5-Fluorouracil      | Antimetabolite (DNA & RNA)        | Other                         | 3385       | 971         |
| 4  | A-443654            | AKT1, AKT2, AKT3                  | PI3K/MTOR signaling           | 10172943   | 426         |
| 5  | A-770041            | LCK, FYN                          | Other, kinases                | 9549184    | 427         |
| 6  | Afatinib            | ERBB2, EGFR                       | EGFR signaling                | 10184653   | 952         |
| 7  | AICA Ribonucleotide | AMPK agonist                      | Metabolism                    | 65110      | 883         |
| 8  | AKT inhibitor VIII  | AKT1, AKT2, AKT3                  | PI3K/MTOR signaling           | 10196499   | 982         |
| 9  | Alectinib           | ALK                               | RTK signaling                 | 49806720   | 977         |
| 10 | Amuvatinib          | KIT, PDGFRA, FLT3                 | Other, kinases                | 11282283   | 973         |
| 11 | AR-42               | HDAC1                             | Chromatin histone acetylation | 6918848    | 968         |
| 12 | AS601245            | JNK1, JNK2, JNK2                  | JNK and p38 signaling         | 10109823   | 928         |
| 13 | AS605240            | PI3Kgamma                         | PI3K/MTOR signaling           | 5289247    | 978         |
| 14 | AT-7519             | CDK1, CDK2, CDK4, CDK6, CDK9      | Cell cycle                    | 11338033   | 979         |
| 15 | Avagacestat         | Amyloid beta20, Amyloid beta40    | Other                         | 46883536   | 980         |
| 16 | Axitinib            | PDGFR, KIT, VEGFR                 | RTK signaling                 | 6450551    | 888         |
| 17 | AZ628               | BRAF                              | ERK MAPK signaling            | 11676786   | 429         |
| 18 | AZD6482             | PI3Kbeta                          | PI3K/MTOR signaling           | 44137675   | 941         |
| 19 | AZD7762             | CHEK1, CHEK2                      | Cell cycle                    | 11152667   | 892         |
| 20 | AZD8055             | MTORC1, MTORC2                    | PI3K/MTOR signaling           | 25262965   | 880         |
| 21 | BAY-61-3606         | SYK                               | Other, kinases                | 10200390   | 928         |
| 22 | Belinostat          | HDAC1                             | Chromatin histone acetylation | 6918638    | 951         |
| 23 | Bexarotene          | Retinoic X receptor (RXR) agonist | Other                         | 82146      | 919         |
| 24 | BI-2536             | PLK1, PLK2, PLK3                  | Cell cycle                    | 11364421   | 425         |
| 25 | Bicalutamide        | AR                                | Hormone-related               | 2375       | 930         |
| 26 | BIX02189            | MEK5, ERK5                        | ERK MAPK signaling            | 46931012   | 978         |
| 27 | BMS-345541          | IKK1, IKK2                        | Other, kinases                | 9813758    | 983         |
| 28 | BMS-509744          | ITK                               | Other                         | 20635522   | 427         |
| 29 | BMS-536924          | IGF1R, IR                         | IGFR signaling                | 10390396   | 426         |

Continues on the next page

| No | Name             | Targets                                           | Target pathway                    | PubCHEM ID | Sample size |
|----|------------------|---------------------------------------------------|-----------------------------------|------------|-------------|
| 30 | BMS-754807       | IGF1R, IR                                         | IGFR signaling                    | 24785538   | 927         |
| 31 | Bortezomib       | Proteasome                                        | Protein stability and degradation | 387447     | 427         |
| 32 | Bosutinib        | SRC, ABL, TEC                                     | Other, kinases                    | 5328940    | 894         |
| 33 | Bryostatins 1    | PKC                                               | Other, kinases                    | 5280757    | 926         |
| 34 | BX796            | TBK1, PDK1 (PDPK1), IKK, AURKB, AURKC             | Other                             | 10077147   | 888         |
| 35 | BX-912           | PDK1 (PDPK1)                                      | PI3K/MTOR signaling               | 11754511   | 981         |
| 36 | Cabozantinib     | VEGFR, MET, RET, KIT, FLT1, FLT3, FLT4, TIE2, AXL | Other, kinases                    | 25102847   | 978         |
| 37 | Camptothecin     | TOP1                                              | DNA replication                   | 104842     | 892         |
| 38 | CAY10603         | HDAC1, HDAC6                                      | Chromatin histone acetylation     | 24951314   | 971         |
| 39 | CCT007093        | PPM1D                                             | Other                             | 2314623    | 962         |
| 40 | CCT-018159       | HSP90                                             | Protein stability and degradation | 5327091    | 939         |
| 41 | Cetuximab        | EGFR                                              | EGFR signaling                    | 85668777   | 903         |
| 42 | CGP-082996       | CDK4                                              | Cell cycle                        | 24825971   | 426         |
| 43 | CGP-60474        | CDK1, CDK2, CDK5, CDK7, CDK9, PKC                 | Cell cycle                        | 644215     | 426         |
| 44 | CHIR-99021       | GSK3A, GSK3B                                      | WNT signaling                     | 9956119    | 950         |
| 45 | CI-1040          | MEK1, MEK2                                        | ERK MAPK signaling                | 6918454    | 881         |
| 46 | Cisplatin        | DNA crosslinker                                   | DNA replication                   | 84691      | 893         |
| 47 | CMK              | RSK2                                              | ERK MAPK signaling                | 16663089   | 426         |
| 48 | CP466722         | ATM                                               | Genome integrity                  | 44551660   | 983         |
| 49 | CP724714         | ERBB2                                             | EGFR signaling                    | 9874913    | 980         |
| 50 | Crizotinib       | MET, ALK, ROS1                                    | RTK signaling                     | 11626560   | 434         |
| 51 | CUDC-101         | HDAC1-10, EGFR, ERBB2                             | Other                             | 24756910   | 960         |
| 52 | CX-5461          | RNA Polymerase 1                                  | Other                             | 25257557   | 974         |
| 53 | Cyclophosphamide | SMO                                               | Other                             | several    | 422         |
| 54 | Cytarabine       | Antimetabolite                                    | DNA replication                   | 6253       | 889         |
| 55 | Dabrafenib       | BRAF                                              | ERK MAPK signaling                | 44462760   | 903         |
| 56 | Dacinostat       | HDAC1                                             | Chromatin histone acetylation     | 6445533    | 932         |
| 57 | Dactolisib       | PI3K (Class 1), MTORC1, MTORC2                    | PI3K/MTOR signaling               | 11977753   | 881         |
| 58 | Daporinad        | NAMPT                                             | Metabolism                        | 6914657    | 935         |
| 59 | Dasatinib        | ABL, SRC, Ephrins, PDGFR, KIT                     | Other                             | 3062316    | 423         |
| 60 | DMOG             | HIF-PH                                            | Metabolism                        | 560326     | 937         |

Continues on the next page

| No | Name         | Targets                     | Target pathway                    | PubCHEM ID | Sample size |
|----|--------------|-----------------------------|-----------------------------------|------------|-------------|
| 61 | Docetaxel    | Microtubule stabiliser      | Mitosis                           | 148124     | 893         |
| 62 | Doramapimod  | p38, JNK2                   | JNK and p38 signaling             | 156422     | 877         |
| 63 | Doxorubicin  | Anthracycline               | DNA replication                   | 31703      | 931         |
| 64 | EHT-1864     | RAC1, RAC2, RAC3            | Cytoskeleton                      | 9938202    | 964         |
| 65 | Elesclomol   | HSP90                       | Protein stability and degradation | 300471     | 892         |
| 66 | Embelin      | XIAP                        | Apoptosis regulation              | 3218       | 932         |
| 67 | Entinostat   | HDAC1, HDAC3                | Chromatin histone acetylation     | 4261       | 428         |
| 68 | Enzastaurin  | PKCB                        | Other, kinases                    | 176167     | 981         |
| 69 | Epothilone B | Microtubule stabiliser      | Mitosis                           | 448013     | 931         |
| 70 | Erlotinib    | EGFR                        | EGFR signaling                    | 176870     | 393         |
| 71 | Etoposide    | TOP2                        | DNA replication                   | 36462      | 940         |
| 72 | Fedratinib   | JAK2                        | Other, kinases                    | 16722836   | 979         |
| 73 | FH535        | PPARgamma, PPARdelta        | WNT signaling                     | 3463933    | 928         |
| 74 | FMK          | RSK                         | Other, kinases                    | none       | 839         |
| 75 | FR-180204    | ERK1, ERK2                  | ERK MAPK signaling                | 11493598   | 978         |
| 76 | FTI-277      | Farnesyl-transferase (FNTA) | Other                             | 3005532    | 940         |
| 77 | Gefitinib    | EGFR                        | EGFR signaling                    | 123631     | 889         |
| 78 | Gemcitabine  | Pyrimidine antimetabolite   | DNA replication                   | 60750      | 926         |
| 79 | GNF-2        | BCR-ABL                     | ABL signaling                     | 5311510    | 424         |
| 80 | GSK1070916   | AURKA, AURKC                | Mitosis                           | 46885626   | 952         |
| 81 | GSK1904529A  | IGF1R, IR                   | IGFR signaling                    | 25124816   | 931         |
| 82 | GSK269962A   | ROCK1, ROCK2                | Cytoskeleton                      | 16095342   | 966         |
| 83 | GSK319347A   | IKK                         | Other                             | 11626927   | 429         |
| 84 | GSK429286A   | ROCK1, ROCK2                | Cytoskeleton                      | 11373846   | 983         |
| 85 | GSK650394    | SGK2, SGK3                  | Other                             | 25022668   | 922         |
| 86 | GSK690693    | AKT1, AKT2, AKT3            | PI3K/MTOR signaling               | 16725726   | 978         |
| 87 | GW-2580      | CSF1R                       | RTK signaling                     | 11617559   | 980         |
| 88 | GW441756     | NTRK1                       | RTK signaling                     | 9943465    | 890         |
| 89 | GW843682X    | PLK1                        | Cell cycle                        | 9826308    | 427         |
| 90 | HG-5-113-01  | LOK, LTK, TRCB, ABL(T315I)  | Other                             | none       | 519         |
| 91 | HG-5-88-01   | EGFR, ADCK4                 | Other, kinases                    | none       | 518         |
| 92 | HG6-64-1     | BRAF                        | ERK MAPK signaling                | 53302361   | 936         |

Continues on the next page



| No  | Name               | Targets                                  | Target pathway                    | PubCHEM ID | Sample size |
|-----|--------------------|------------------------------------------|-----------------------------------|------------|-------------|
| 93  | I-BET-762          | BRD2, BRD3, BRD4                         | Chromatin other                   | 46943432   | 975         |
| 94  | Idelalisib         | PI3Kdelta                                | PI3K/MTOR signaling               | 11625818   | 982         |
| 95  | Imatinib           | ABL, KIT, PDGFR                          | RTK signaling                     | 5291       | 436         |
| 96  | IOX2               | EGLN1                                    | Other                             | 54685215   | 967         |
| 97  | IPA-3              | PAK1                                     | Cytoskeleton                      | 521106     | 930         |
| 98  | Ispinesib Mesylate | KSP                                      | Mitosis                           | 6450816    | 982         |
| 99  | JNK Inhibitor VIII | JNK                                      | JNK and p38 signaling             | 11624601   | 886         |
| 100 | JNK-9L             | JNK2, JNK3                               | JNK and p38 signaling             | 25222038   | 940         |
| 101 | JQ1                | BRD2, BRD3, BRD4, BRDT                   | Chromatin other                   | 46907787   | 950         |
| 102 | JW-7-24-1          | LCK                                      | Other, kinases                    | none       | 980         |
| 103 | JW-7-52-1          | MTOR                                     | PI3K/MTOR signaling               | 49836027   | 411         |
| 104 | KIN001-244         | PDK1 (PDPK1)                             | Other, kinases                    | 56965967   | 977         |
| 105 | KIN001-260         | IKKB                                     | Other                             | 10451420   | 977         |
| 106 | KIN001-266         | MAP3K8                                   | Other, kinases                    | 44143370   | 978         |
| 107 | KIN001-270         | CDK9                                     | Cell cycle                        | 66577006   | 978         |
| 108 | KU-55933           | ATM                                      | Genome integrity                  | 5278396    | 887         |
| 109 | Lapatinib          | ERBB2, EGFR                              | EGFR signaling                    | 208908     | 422         |
| 110 | Lenalidomide       | CRBN                                     | Protein stability and degradation | 216326     | 893         |
| 111 | Lestauritinib      | FLT3, JAK2, NTRK1, NTRK2, NTRK3          | Other, kinases                    | 126565     | 892         |
| 112 | LFM-A13            | BTK                                      | Other, kinases                    | 54676905   | 930         |
| 113 | Linifanib          | VEGFR1, VEGFR2, VEGFR3, CSF1R, FLT3, KIT | RTK signaling                     | 11485656   | 980         |
| 114 | Linsitinib         | IGF1R                                    | IGFR signaling                    | 11640390   | 927         |
| 115 | Luminespib         | HSP90                                    | Protein stability and degradation | 10096043   | 921         |
| 116 | Masitinib          | KIT, PDGFRA, PDGFRB                      | Other, kinases                    | 10074640   | 979         |
| 117 | Methotrexate       | Antimetabolite                           | DNA replication                   | 126941     | 892         |
| 118 | MG-132             | Proteasome, CAPN1                        | Protein stability and degradation | 462382     | 427         |
| 119 | Midostaurin        | PKC, PPK, FLT1, c-FGR, others            | Other                             | several    | 941         |
| 120 | Mitomycin-C        | DNA crosslinker                          | DNA replication                   | 5746       | 932         |
| 121 | MK-2206            | AKT1, AKT2                               | PI3K/MTOR signaling               | 46930998   | 864         |
| 122 | Motesanib          | VEGFR, RET, KIT, PDGFR                   | RTK signaling                     | 11667893   | 887         |

Continues on the next page

| No  | Name               | Targets                        | Target pathway                | PubCHEM ID | Sample size |
|-----|--------------------|--------------------------------|-------------------------------|------------|-------------|
| 123 | MPS-1-IN-1         | MPS1                           | Mitosis                       | 25195352   | 976         |
| 124 | Navitoclax         | BCL2, BCL-XL, BCL-W            | Apoptosis regulation          | 24978538   | 888         |
| 125 | NG-25              | TAK1, MAP4K2                   | Other, kinases                | 53340664   | 977         |
| 126 | Nilotinib          | ABL                            | ABL signaling                 | 644241     | 843         |
| 127 | NPK76-II-72-1      | PLK3                           | Cell cycle                    | none       | 978         |
| 128 | NSC-207895         | MDM4                           | p53 pathway                   | 42640      | 971         |
| 129 | NSC-87877          | SHP-1 (PTPN6), SHP-2 (PTPN11)  | Other                         | 5459322    | 936         |
| 130 | NU7441             | DNAPK                          | Genome integrity              | 11327430   | 885         |
| 131 | Nutlin-3a (-)      | MDM2                           | p53 pathway                   | 11433190   | 888         |
| 132 | NVP-BHG712         | EPHB4                          | Other                         | 16747388   | 978         |
| 133 | NVP-TAE684         | ALK                            | RTK signaling                 | 16038120   | 434         |
| 134 | Obatoclax Mesylate | BCL2, BCL-XL, BCL-W, MCL1      | Apoptosis regulation          | 11404337   | 923         |
| 135 | Olaparib           | PARP1, PARP2                   | Genome integrity              | 23725625   | 940         |
| 136 | Omipalisib         | PI3K (class 1), MTORC1, MTORC2 | PI3K/MTOR signaling           | 25167777   | 980         |
| 137 | OSI-027            | MTORC1, MTORC2                 | PI3K/MTOR signaling           | 44224160   | 974         |
| 138 | OSI-930            | KIT                            | RTK signaling                 | 9868037    | 979         |
| 139 | OSU-03012          | PDK1 (PDPK1)                   | Other, kinases                | 10027278   | 930         |
| 140 | PAC-1              | Procaspase-3, Procaspase-7     | Apoptosis regulation          | 6753378    | 919         |
| 141 | Paclitaxel         | Microtubule stabiliser         | Mitosis                       | 36314      | 427         |
| 142 | Palbociclib        | CDK4, CDK6                     | Cell cycle                    | 5330286    | 864         |
| 143 | Parthenolide       | HDAC1                          | Chromatin histone acetylation | 7251185    | 429         |
| 144 | Pazopanib          | CSF1R, KIT, PDGFRA, PDGFRB     | RTK signaling                 | 10113978   | 928         |
| 145 | PD0325901          | MEK1, MEK2                     | ERK MAPK signaling            | 9826528    | 880         |
| 146 | PD173074           | FGFR1, FGFR3                   | RTK signaling                 | 1401       | 888         |
| 147 | Pelitinib          | EGFR                           | EGFR signaling                | 6445562    | 979         |
| 148 | Pevonedistat       | NAE                            | Other                         | 16720766   | 725         |
| 149 | PF-4708671         | S6K1                           | PI3K/MTOR signaling           | 51371303   | 950         |
| 150 | PF-562271          | FAK, FAK2                      | Cytoskeleton                  | 11713159   | 921         |
| 151 | PFI-1              | BRD4                           | Chromatin other               | 71271629   | 969         |
| 152 | PHA-665752         | MET                            | RTK signaling                 | 10461815   | 435         |
| 153 | PHA-793887         | CDK2, CDK7, CDK5               | Cell cycle                    | 46191454   | 980         |

Continues on the next page

| No  | Name                 | Targets                                     | Target pathway                | PubCHEM ID | Sample size |
|-----|----------------------|---------------------------------------------|-------------------------------|------------|-------------|
| 154 | Phenformin           | Biguanide agent                             | Other                         | 8249       | 969         |
| 155 | PI-103               | PI3Kalpha, DAPK3, CLK4, PIM3, HIPK2         | PI3K/MTOR signaling           | 9884685    | 969         |
| 156 | Pictilisib           | PI3K (class 1)                              | PI3K/MTOR signaling           | 17755052   | 919         |
| 157 | PIK-93               | PI3Kgamma                                   | PI3K/MTOR signaling           | 6852167    | 978         |
| 158 | Piperlongumine       | Induces reactive oxygen species             | Other                         | 637858     | 965         |
| 159 | PLX-4720             | BRAF                                        | ERK MAPK signaling            | 24180719   | 955         |
| 160 | Ponatinib            | ABL, PDGFRA, VEGFR2, FGFR1, SRC, TIE2, FLT3 | RTK signaling                 | 24826799   | 940         |
| 161 | Pyrimethamine        | Dihydrofolate reductase (DHFR)              | Other                         | 4993       | 429         |
| 162 | QS11                 | ARFGAP1                                     | Other                         | 4263900    | 931         |
| 163 | Quizartinib          | FLT3                                        | RTK signaling                 | 24889392   | 979         |
| 164 | Rapamycin            | MTORC1                                      | PI3K/MTOR signaling           | 5384616    | 389         |
| 165 | Refametinib          | MEK1, MEK2                                  | ERK MAPK signaling            | 44182295   | 910         |
| 166 | RO-3306              | CDK1                                        | Cell cycle                    | 44450571   | 888         |
| 167 | Rucaparib            | PARP1, PARP2                                | Genome integrity              | 9931953    | 964         |
| 168 | Ruxolitinib          | JAK1, JAK2                                  | Other, kinases                | 25126798   | 982         |
| 169 | Salubrinal           | EIF2A                                       | Other                         | 5717801    | 424         |
| 170 | Saracatinib          | ABL, SRC                                    | RTK signaling                 | 10302451   | 436         |
| 171 | SB216763             | GSK3A, GSK3B                                | WNT signaling                 | 176158     | 785         |
| 172 | SB-505124            | ALK4, ALK5                                  | RTK signaling                 | 9858940    | 966         |
| 173 | SB52334              | ALK5                                        | RTK signaling                 | 9967941    | 977         |
| 174 | SB590885             | BRAF                                        | ERK MAPK signaling            | 11316960   | 868         |
| 175 | Seliciclib           | CDK2, CDK7, CDK9                            | Cell cycle                    | 160355     | 422         |
| 176 | Selisistat           | SIRT1                                       | Chromatin histone acetylation | 5113032    | 974         |
| 177 | Selumetinib          | MEK1, MEK2                                  | ERK MAPK signaling            | 10127622   | 956         |
| 178 | Sepantronium bromide | BIRC5                                       | Apoptosis regulation          | 11178236   | 945         |
| 179 | Serdemetan           | MDM2                                        | p53 pathway                   | 11609586   | 961         |
| 180 | SGC0946              | DOT1L                                       | Chromatin histone methylation | 56962337   | 944         |
| 181 | Shikonin             | not defined                                 | Other                         | 5208       | 937         |
| 182 | SL0101               | RSK, AURKB, PIM1, PIM3                      | Other                         | 10459196   | 872         |

Continues on the next page

| No  | Name                | Targets                             | Target pathway                    | PubCHEM ID | Sample size |
|-----|---------------------|-------------------------------------|-----------------------------------|------------|-------------|
| 183 | SN-38               | TOP1                                | DNA replication                   | 104842     | 968         |
| 184 | SNX-2112            | HSP90                               | Protein stability and degradation | 24772860   | 970         |
| 185 | Sorafenib           | PDGFR, KIT, VEGFR, RAF              | RTK signaling                     | 216239     | 431         |
| 186 | STF-62247           | Autophagy inducer                   | Other                             | 704473     | 975         |
| 187 | S-Trityl-L-cysteine | KIF11                               | Mitosis                           | 76044      | 425         |
| 188 | Sunitinib           | PDGFR, KIT, VEGFR, FLT3, RET, CSF1R | RTK signaling                     | 5329102    | 426         |
| 189 | T0901317            | LXR, FXR                            | Other                             | 447912     | 972         |
| 190 | TAK-715             | p38alpha, p38beta                   | JNK and p38 signaling             | 9952773    | 983         |
| 191 | Talazoparib         | PARP1, PARP2                        | Genome integrity                  | 44819241   | 952         |
| 192 | Tamoxifen           | ESR1                                | Hormone-related                   | 2733526    | 966         |
| 193 | Tanespimycin        | HSP90                               | Protein stability and degradation | 6505803    | 889         |
| 194 | Temozolomide        | DNA alkylating agent                | DNA replication                   | 5394       | 944         |
| 195 | TGX221              | PI3Kbeta                            | PI3K/MTOR signaling               | 9907093    | 427         |
| 196 | Thapsigargin        | SERCA                               | Other                             | 446378     | 914         |
| 197 | Tipifarnib          | Farnesyl-transferase (FNTA)         | Other                             | 159324     | 928         |
| 198 | Tivozanib           | VEGFR1, VEGFR2, VEGFR3              | RTK signaling                     | 9911830    | 978         |
| 199 | Tozasertib          | AURKA, AURKB, AURKC, others         | Mitosis                           | 5494449    | 421         |
| 200 | TPCA-1              | IKK2                                | Other, kinases                    | 9903786    | 978         |
| 201 | Trametinib          | MEK1, MEK2                          | ERK MAPK signaling                | 11707110   | 930         |
| 202 | Tretinoin           | Retinoic acid                       | Other                             | 444795     | 883         |
| 203 | Tubastatin A        | HDAC1, HDAC6, HDAC8                 | Chromatin histone acetylation     | 53394750   | 974         |
| 204 | TW 37               | BCL2, BCL-XL, MCL1                  | Apoptosis regulation              | 11455910   | 963         |
| 205 | UNC0638             | G9a and GLP methyltransferases      | Chromatin histone methylation     | 46224516   | 972         |
| 206 | UNC1215             | L3MBTL3                             | Chromatin other                   | 57339144   | 945         |
| 207 | Veliparib           | PARP1, PARP2                        | Genome integrity                  | 11960529   | 893         |
| 208 | Vinblastine         | Microtubule destabiliser            | Mitosis                           | 6710780    | 893         |
| 209 | Vinorelbine         | Microtubule destabiliser            | Mitosis                           | 5311497    | 941         |
| 210 | Vismodegib          | SMO                                 | Other                             | 24776445   | 893         |
| 211 | VNLG/124            | HDAC,RAR                            | Chromatin histone acetylation     | 24894414   | 974         |

Continues on the next page

| No  | Name        | Targets                                | Target pathway                | PubCHEM ID | Sample size |
|-----|-------------|----------------------------------------|-------------------------------|------------|-------------|
| 212 | Vorinostat  | HDAC inhibitor Class I, IIa, IIb, IV   | Chromatin histone acetylation | 5311       | 894         |
| 213 | VX-11e      | ERK2                                   | ERK MAPK signaling            | 11634725   | 977         |
| 214 | VX-702      | p38                                    | JNK and p38 signaling         | 10341154   | 890         |
| 215 | WH-4-023    | SRC, LCK                               | Other, kinases                | 11844351   | 424         |
| 216 | WHI-P97     | JAK3                                   | Other, kinases                | 3796       | 978         |
| 217 | WIK14       | TNKS1, TNKS2                           | WNT signaling                 | 2984337    | 975         |
| 218 | WZ-1-84     | BMX                                    | Other, kinases                | 49821040   | 426         |
| 219 | WZ3105      | SRC, ROCK2, NTRK2, FLT3, IRAK1, others | Other                         | none       | 979         |
| 220 | XAV939      | TNKS1, TNKS2                           | WNT signaling                 | 2726824    | 956         |
| 221 | XMD8-85     | ERK5, BET                              | Other                         | 46844147   | 423         |
| 222 | XMD8-92     | MAPK7                                  | Other, kinases                | 46843772   | 520         |
| 223 | Y-39983     | ROCK                                   | Cytoskeleton                  | 9810884    | 978         |
| 224 | YK-4-279    | RNA helicase A                         | Other                         | 44632017   | 821         |
| 225 | YM201636    | PYKFYVE                                | Other                         | 9956222    | 978         |
| 226 | Zibotentan  | Endothelin-1 receptor (EDNRA)          | Other                         | 9910224    | 977         |
| 227 | Z-LLNle-CHO | gamma-secretase                        | Other                         | 16760646   | 426         |
| 228 | ZM447439    | AURKA, AURKB                           | Mitosis                       | 9914412    | 836         |
| 229 | ZSTK474     | PI3K (class 1)                         | PI3K/MTOR signaling           | 11647372   | 982         |

Supplementary Table S4. Five-fold cross validation of CDRscan.

| Model           | $R^2$  |        |        |        |        | Mean  |
|-----------------|--------|--------|--------|--------|--------|-------|
|                 | Fold 0 | Fold 1 | Fold 2 | Fold 3 | Fold 4 |       |
| <b>CDRscan</b>  |        |        |        |        |        |       |
| master          | 0.844  | 0.848  | 0.846  | 0.851  | 0.845  | 0.847 |
| fully connected | 0.843  | 0.850  | 0.846  | 0.846  | 0.850  | 0.847 |
| shallow         | 0.846  | 0.849  | 0.847  | 0.847  | 0.850  | 0.848 |
| tanh            | 0.846  | 0.852  | 0.846  | 0.847  | 0.849  | 0.848 |
| unified         | 0.848  | 0.850  | 0.843  | 0.846  | 0.850  | 0.847 |
